# Supplementary material for: Solid-state silicon anode with extremely high initial coulombic efficiency
Source: Royal Society of Chemistry journal article supplement (doi:10.1039/d2ee04057c), 2023-01-01
Supplement: d2ee04057c1.pdf [file d2ee04057c1.pdf]

## Supporting Information

### Solid-State Silicon Anode with Extremely High Initial Coulombic Efficiency

Yonglin Huang,<sup>a</sup> Bowen Shao,<sup>a</sup> Yan Wang<sup>\*b</sup> and Fudong Han<sup>\*a</sup>

<sup>a</sup> Department of Mechanical, Aerospace and Nuclear Engineering, Rensselaer Polytechnic Institute, 110 8th Street, Troy, New York 12180, USA. Email: hanf2@rpi.edu

<sup>b</sup> Advanced Materials Lab, Samsung Advanced Institute of Technology-America, Samsung Semiconductor Inc., Cambridge, MA, USA. Email: eric.wangyan@samsung.com

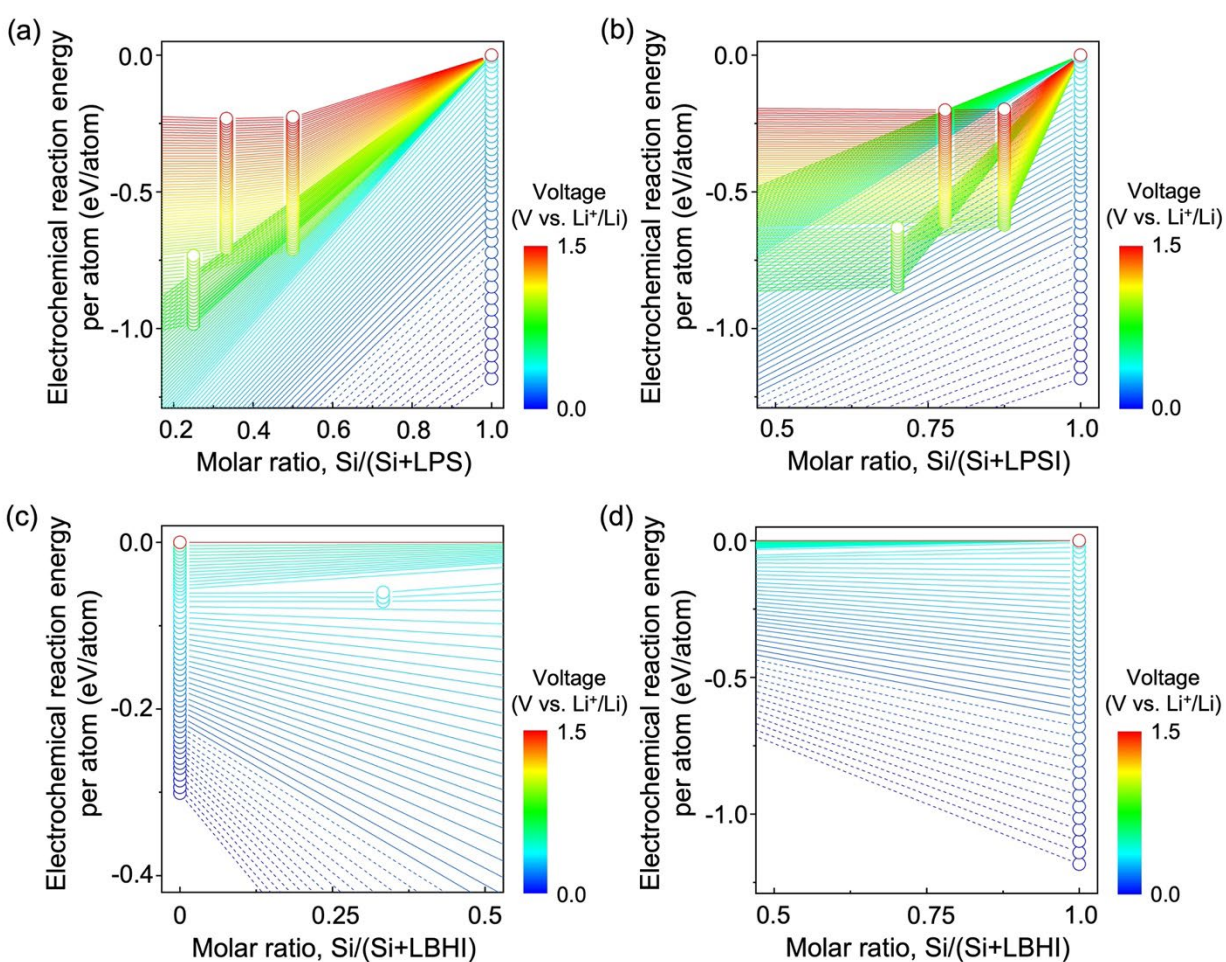

Figure S1. Magnified views of electrochemical reaction energies of Figure 1 for (a) Si-LPS, (b) Si-LPSI, and (c-d) Si-LBHI.

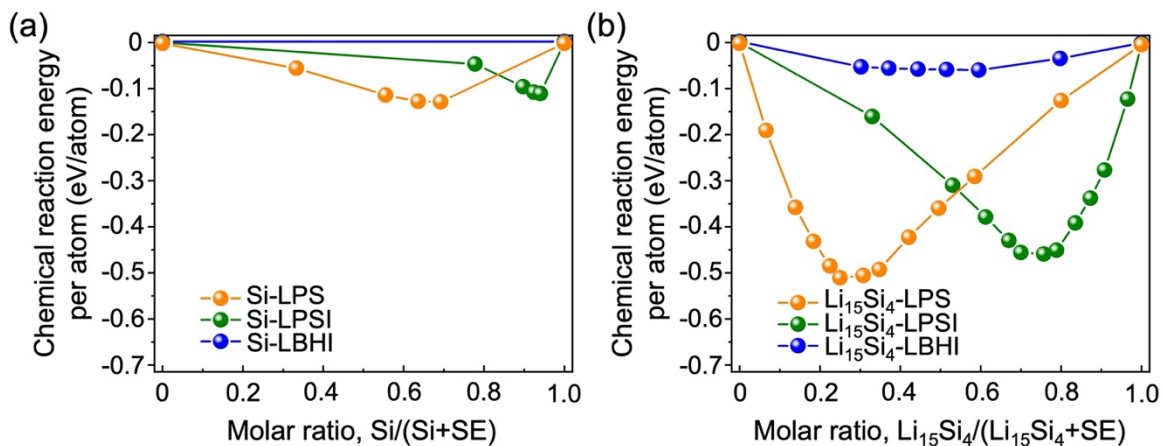

Figure S2. Calculated chemical reaction energy of (a) Si and (b)  $\text{Li}_{15}\text{Si}_4$  with three SEs as a function of Si or  $\text{Li}_{15}\text{Si}_4$  molar ratio.

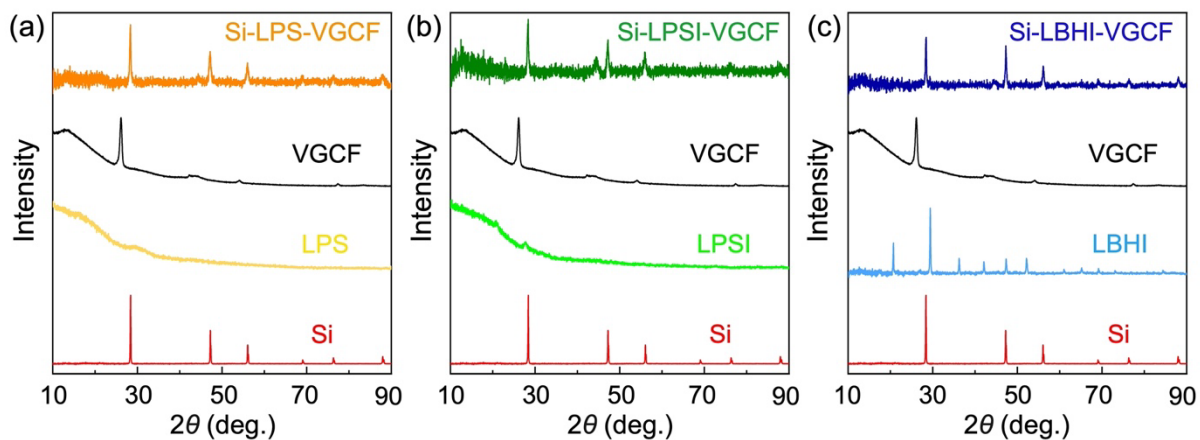

Figure S3. XRD patterns of components and ball-milled composites for (a) Si-LPS-VGCF, (b) Si-LPSI-VGCF, and (c) Si-LBHI-VGCF. The mass ratio of micro-sized Si, SE, and VGCF is 6:4:1 in the composites.

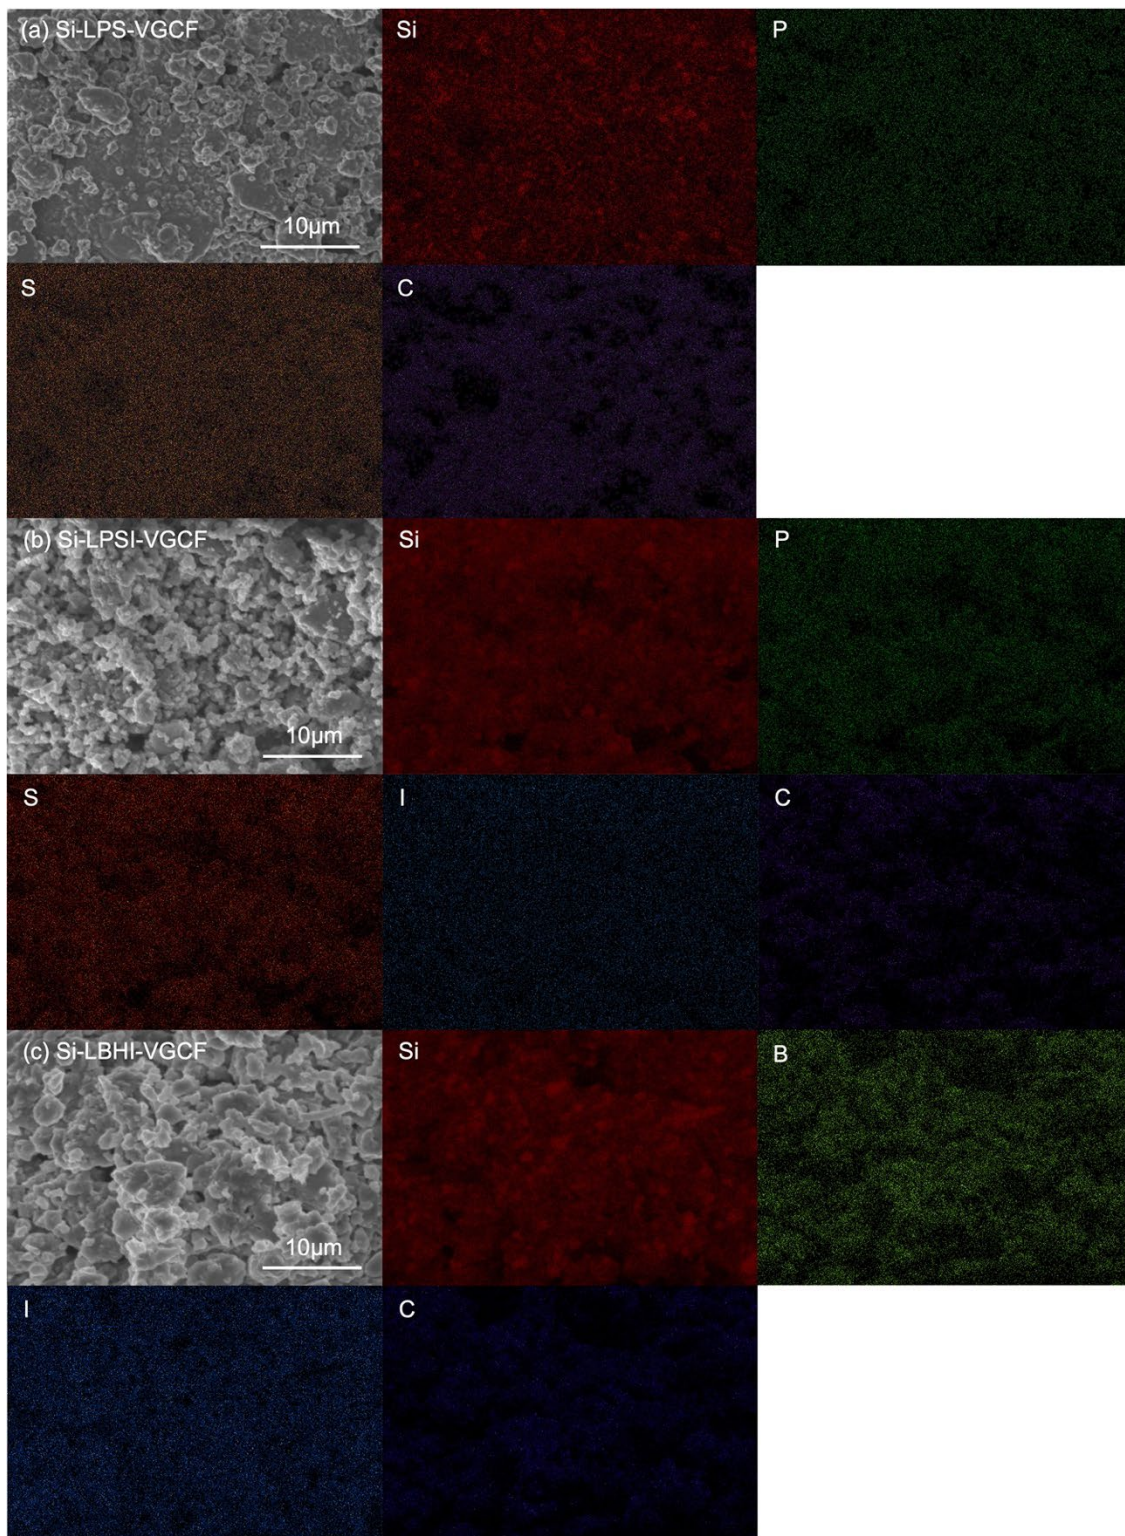

Figure S4. SEM and EDS mapping of ball-milled Si composites, (a) Si-LPS-VGCF, (b) Si-LPSI-VGCF, and (c) Si-LBHI-VGCF, with a mass ratio of 6:4:1.

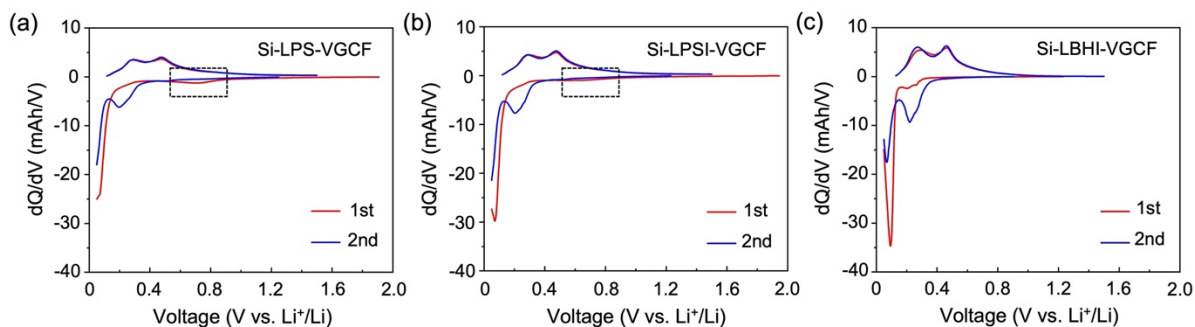

Figure S5. The differential capacity ( $dQ/dV$ ) plots of (a) Si-LPS-VGCF, (b) Si-LPSI-VGCF, and (c) Si-LBHI-VGCF with a mass ratio of 6:4:1. The dashed rectangles indicate the electrochemical instability of LPS and LPSI during the first discharge.

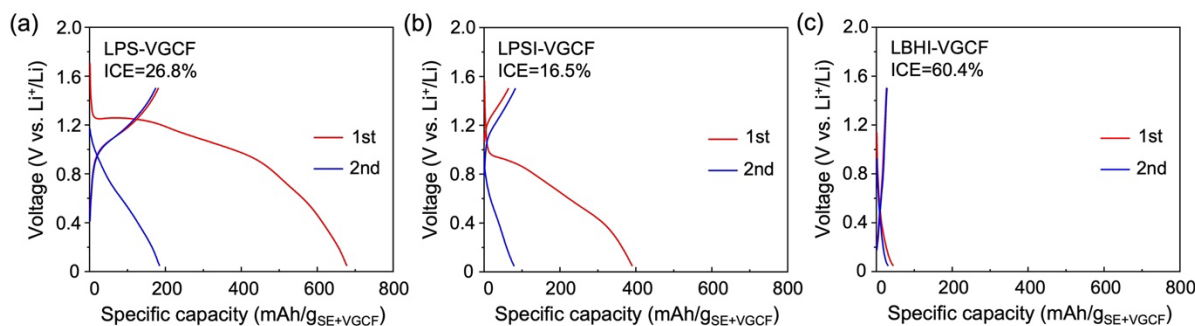

Figure S6. Voltage profiles of Li-In half cells. The anode composites, (a) LPS-VGCF, (b) LPSI-VGCF, and (c) LBHI-VGCF, were prepared by ball milling SE and VGCF in a mass ratio of 6:1. These half cells were made by the same procedure as Figure 2(a-c) with an electrode mass of 3.18 mg SE-VGCF. The current is 0.382 mA and the voltage range is 0.05 – 1.5 V vs.  $\text{Li}^+/\text{Li}$  (or -0.55 – 0.9 V vs. Li-In) at 60 °C. The small capacity in Figure S6(c) is provided by VGCF, not the decomposition of LBHI.

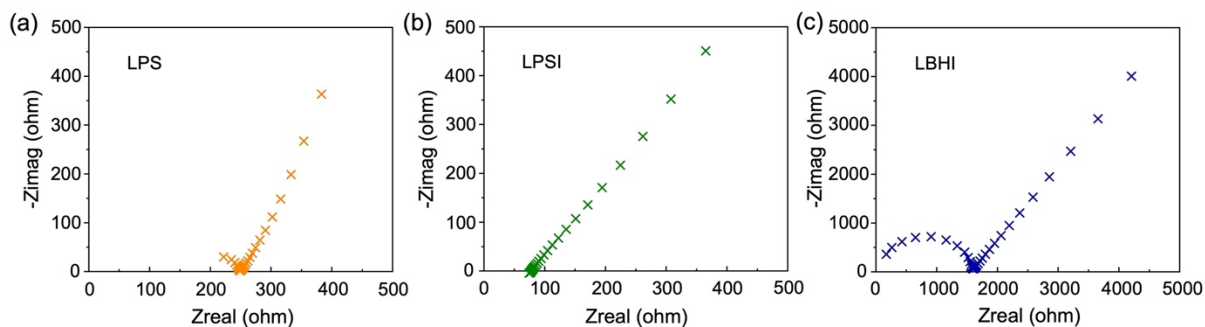

Figure S7. Nyquist plots of symmetrical cells with (a) LPS, (b) LPSI, and (c) LBHI SE at 25 °C. 200 mg SE was stacked between two stainless steel electrodes. The bulk resistance used for the calculation of ionic conductivities is obtained from the intercept of the Nyquist curve with the Zreal axis. The ionic conductivities of LPS, LPSI, and LBHI are 0.5, 1.2, and 0.1 mS/cm, respectively.

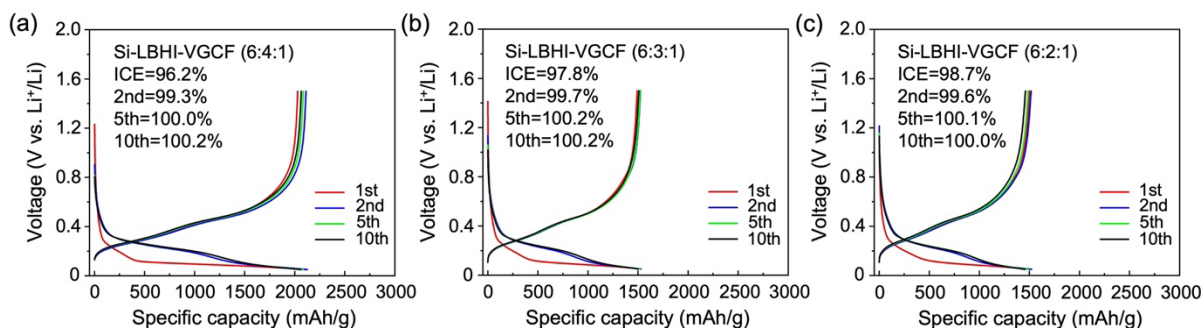

Figure S8. Charge/discharge curves of Si-LBHI-VGCF anodes with different contents of SE. The mass ratio of micro-sized Si, LBHI, and VGCF is (a) 6:4:1, (b) 6:3:1, and (c) 6:2:1, respectively. The cells are tested at a current of 210 mA/g<sub>Si</sub> within the voltage range of 0.05 – 1.5 V vs. Li<sup>+</sup>/Li (or -0.55 – 0.9 V vs. Li-In) at 60 °C.

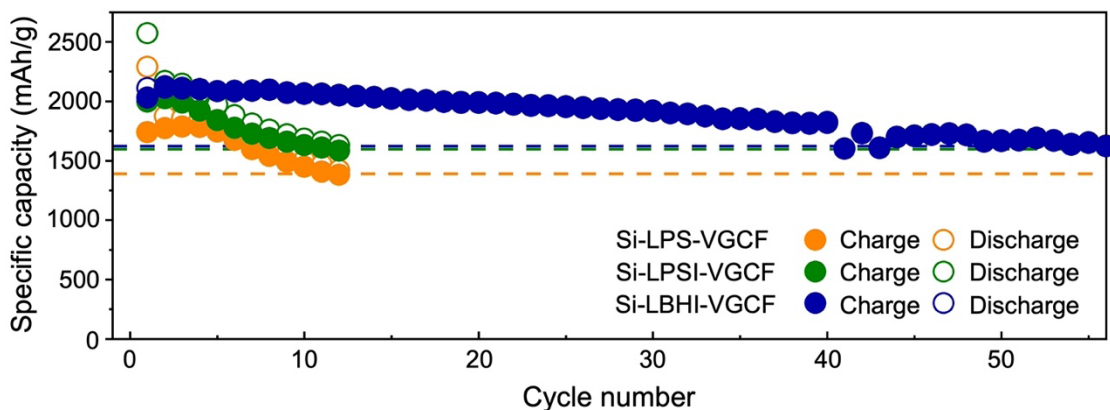

Figure S9. Long-term cycling performance of Si | Li-In half cells. The mass ratio of micro-sized Si, SE, and VGCF is 6:4:1. The dashed line indicates 80% of the first charge capacity of each half cell. The current value is 210 mA/g<sub>Si</sub> and the voltage range is 0.05 – 1.5 V vs. Li<sup>+</sup>/Li (or -0.55 – 0.9 V vs. Li-In) at 60 °C. The half cell using Si-LBHI-VGCF can stably retain 80% initial charge capacity for about 40 cycles.

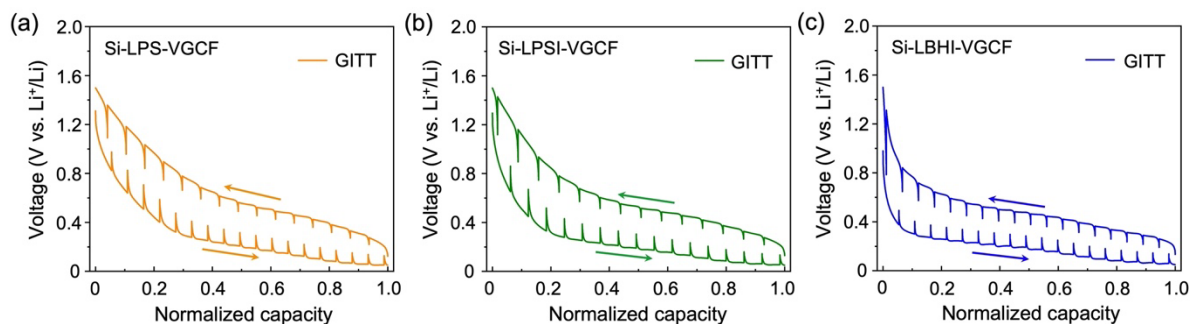

Figure S10. Voltage curves of Si | Li-In half cells during GITT tests as a function of normalized capacity. This GITT measurement (pulse time 0.5 hr, relaxation time 3 hr) was applied during the second cycle. The mass ratio of micro-sized Si, SE, and VGCF is 4:6:1 for (a) Si-LPS-VGCF, (b) Si-LPSI-VGCF, and (c) Si-LBHI-VGCF. The current value is 210 mA/g<sub>Si</sub> and the voltage range is 0.05 – 1.5 V vs. Li<sup>+</sup>/Li (or -0.55 – 0.9 V vs. Li-In) at 60 °C.

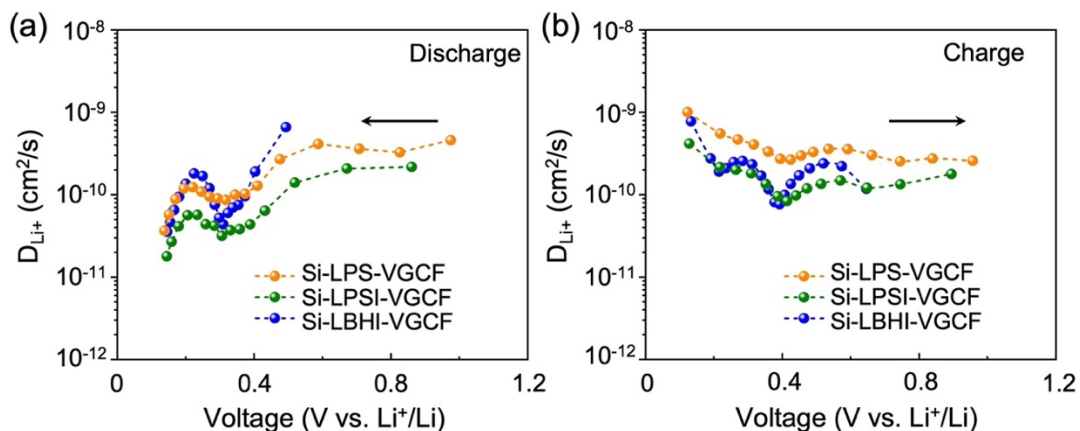

Figure S11. GITT-derived apparent lithium diffusion coefficients ( $D_{\text{Li}^+}$ ) for Si composites in the discharge (a) and charge (b) processes.  $D_{\text{Li}^+}$  was calculated according to the below equation<sup>1-7</sup>:

$$D_{\text{Li}^+} = \frac{4}{\pi\tau} \left( \frac{m_{\text{B}} V_{\text{M}}}{M_{\text{B}} S} \right)^2 \left( \frac{\Delta E_{\text{s}}}{\Delta E_{\text{t}}} \right)^2 \quad (\tau \ll L^2 / D_{\text{Li}^+})$$

in which  $\tau$  (= 1800 s) is the duration of the current pulse,  $m_{\text{B}}$  (= 0.00182 g) is the mass of active material within composites,  $V_{\text{M}}$  is the molar volume of Si composites,  $M_{\text{B}}$  (= 28.0855 g/mol) is the molar mass of Si,  $S$  (= 0.7854 cm<sup>2</sup>) is the apparent contact area,  $\Delta E_{\text{s}}$  is the voltage change of the steady state, and  $\Delta E_{\text{t}}$  is the voltage change during the current pulse, neglecting the IR drop ( $I$  is the applied current,  $R$  is SE resistance).

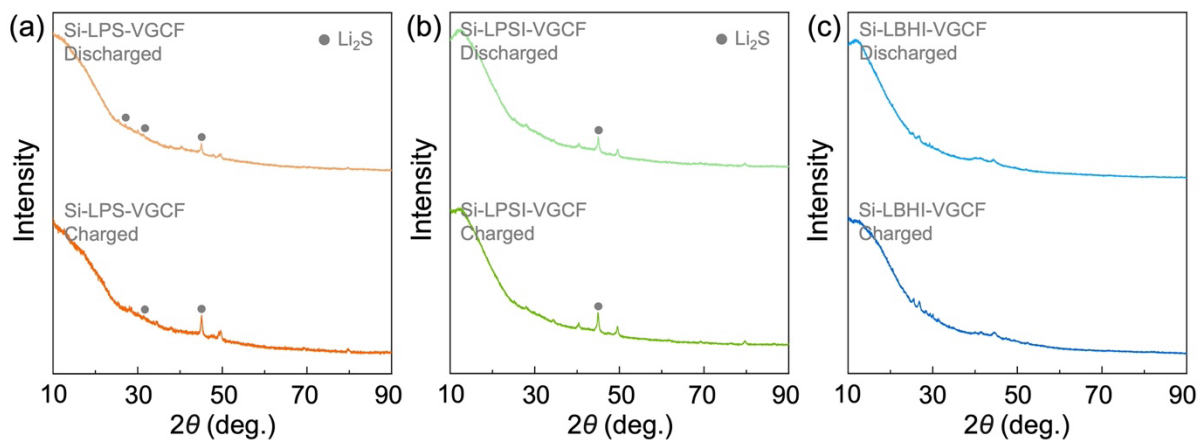

Figure S12. XRD patterns (a) Si-LPS-VGCF, (b) Si-LPSI-VGCF, and (c) Si-LBHI-VGCF after discharge (top) and after one cycle (bottom) of Si || Li-In half cells. The mass ratio of micro-sized Si, SE, and VGCF is 6:4:1 in the composites.

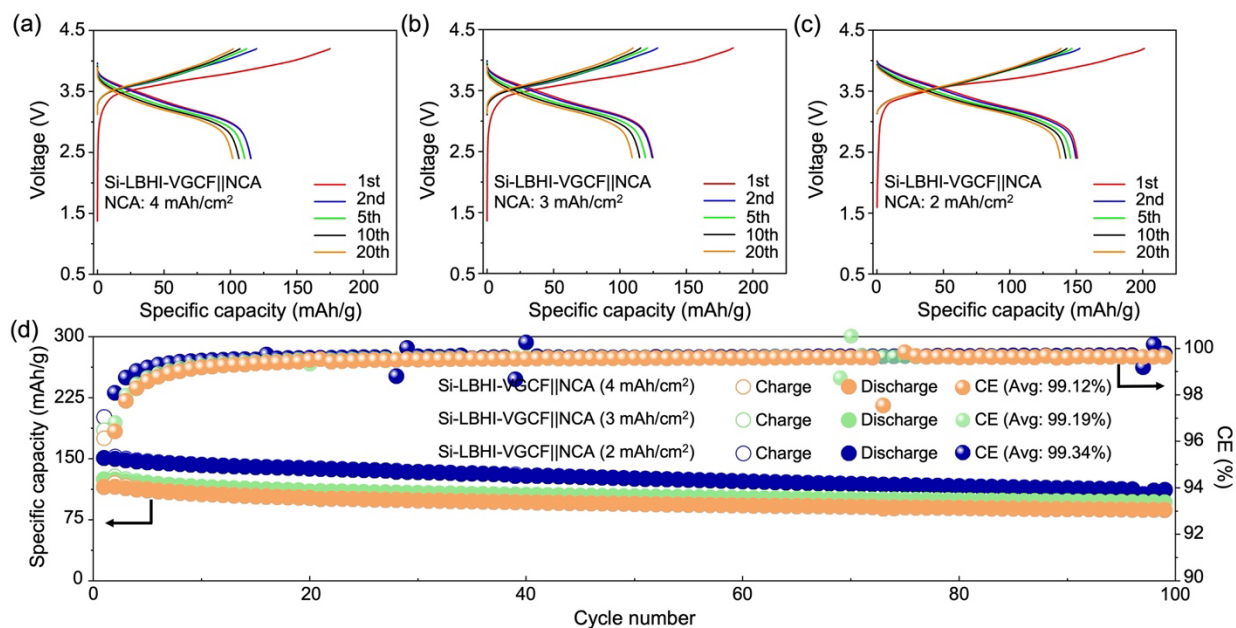

Figure S13. Charge/discharge curves of solid-state Si-LBHI-VGCF||NCA full cells with a cathode areal capacity of (a) 4.0 mAh/cm<sup>2</sup>, (b) 3.0 mAh/cm<sup>2</sup>, and (c) 2.0 mAh/cm<sup>2</sup>. (d) Cycling performance and CEs of Si-LBHI-VGCF||NCA full cells with different cathode areal capacities. The NP ratio for the cells is kept at 2.74. The mass ratio of micro-sized Si, LBHI, and VGCF is 6:4:1. The cells were tested at 0.5C (based on 180 mAh/g<sub>NCA</sub>) within a voltage range of 2.4 – 4.2 V at 60 °C.



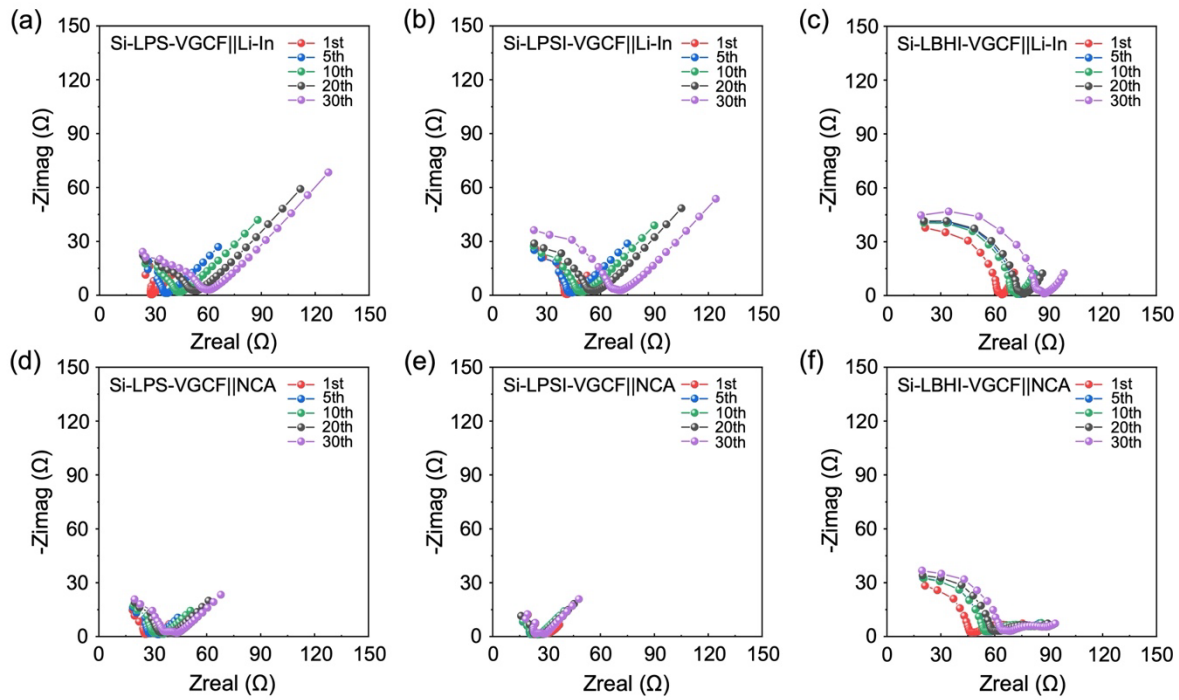

Figure S14. The Nyquist plots of (a) Si-LPS-VGCF||Li-In, (b) Si-LPSI-VGCF||Li-In, (c) Si-LBHI-VGCF||Li-In, (d) Si-LPS-VGCF||NCA, (e) Si-LPSI-VGCF||NCA, and (f) Si-LBHI-VGCF||NCA cells after different cycles. The Nyquist plots were obtained from the corresponding batteries in Figure 2(a-c) and Figure 5(a-c). The mass ratio of micro-sized Si, SE, and VGCF is 6:4:1. The PEIS data were acquired with an amplitude of 10 mV and a frequency range of 15 MHz – 1 Hz.

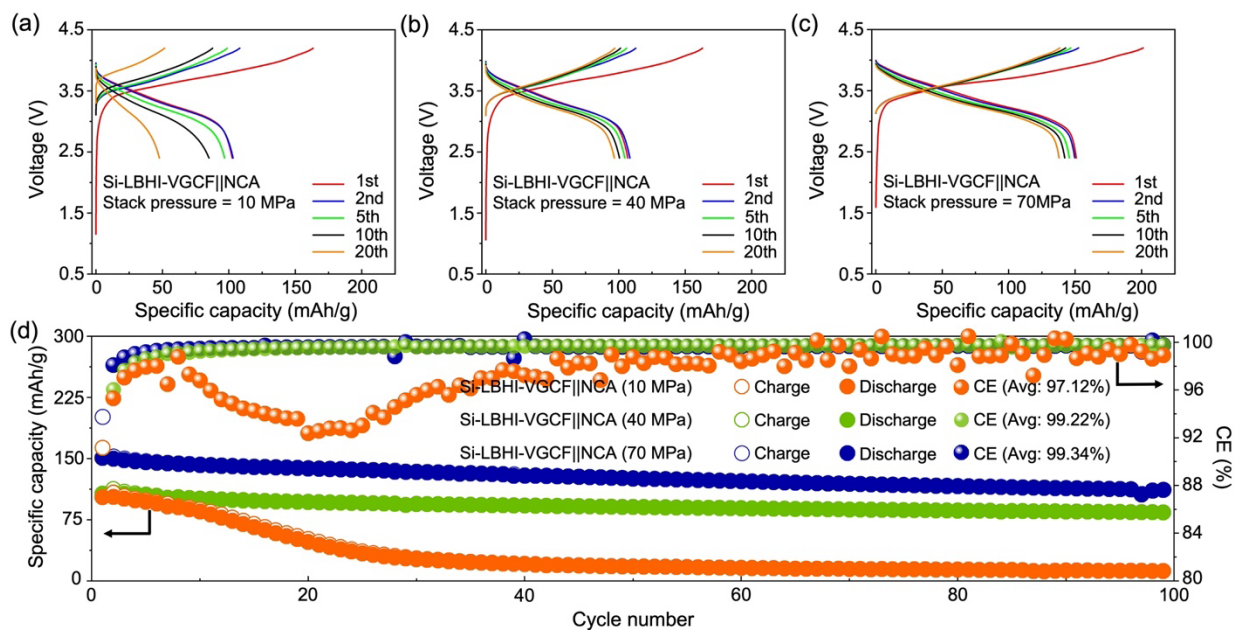

Figure S15. Charge/discharge curves of solid-state Si-LBHI-VGCF||NCA full cells under a stack pressure of (a) 10 MPa, (b) 40 MPa, and (c) 70 MPa. (d) Cycling performance and CEs of Si-LBHI-VGCF||NCA full cells under different stack pressures. The mass ratio of micro-sized Si, LBHI, and VGCF is 6:4:1. The cells were tested at 0.5C (= 0.785 mA) within a voltage range of 2.4 – 4.2 V at 60 °C. The areal capacity of the NCA cathode is 2 mAh/cm<sup>2</sup>.

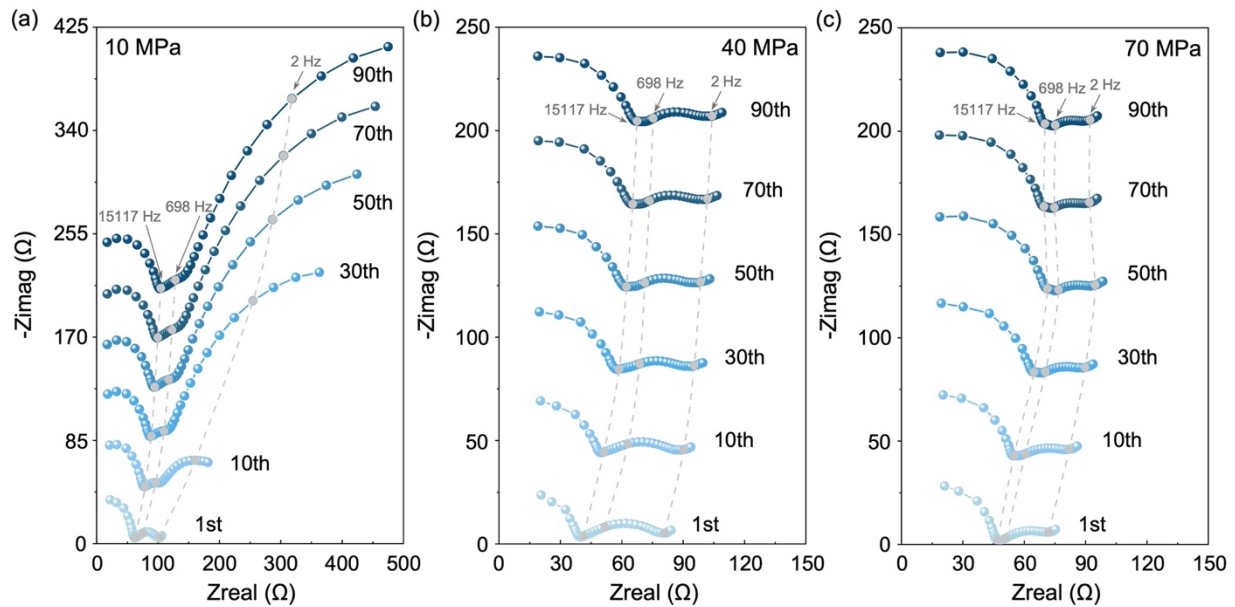

Figure S16. The evolution of impedance of Si-LBHI-VGCF||NCA full cells under different stack pressure of (a) 10 MPa, (b) 40 MPa, and (c) 70 MPa. The Nyquist plots were obtained from the corresponding batteries in Figure S15 after different cycles. The mass ratio of micro-sized Si, LBHI, and VGCF is 6:4:1. The PEIS data were acquired with an amplitude of 10 mV and a frequency range of 15 MHz – 1 Hz.

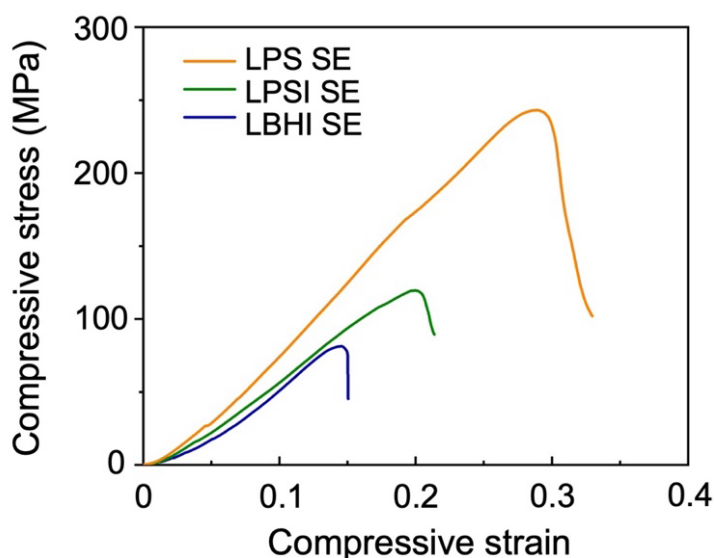

Figure S17. The compressive stress-strain curves of three cold-pressed SEs. The compression rate is 0.1 mm/min. Detailed sample parameters are shown below. All three curves show several minor pre-fracture cracks, but the stress continues to increase due to the compressive state until it reaches the peak. LBHI has a brittle fracture, as indicated by the vertical stress drop, while LPS and LPSI show ductility.

| Materials          | Cold-pressed cylinder |           | Cylinder weight/mg | Young's modulus/GPa   | Peak load/N |
|--------------------|-----------------------|-----------|--------------------|-----------------------|-------------|
|                    | Diameter/mm           | Height/mm |                    |                       |             |
| LPS <sup>*1</sup>  | 10                    | 1.400     | 197.7              | 1.01449               | 19094.42773 |
| LPSI <sup>*1</sup> | 10                    | 1.195     | 205.4              | 0.76741 <sup>*2</sup> | 9389.91699  |
| LBHI <sup>*1</sup> | 10                    | 1.373     | 162.0              | 0.82395 <sup>*2</sup> | 6395.18848  |

Note: \*1. The cold-press pressure for preparing SE cylinders is 750 MPa, except LBHI. If LBHI is cold-pressed at 750 MPa, the LBHI cylinder will break when it is ejected out of the stainless-steel mold because LBHI is closely attached to the steel mold. Therefore, the maximum cold-press pressure for LBHI is 350 MPa.

\*2. The modulus of LPSI is slightly smaller than that of LBHI in the above Table because the Instron system calculates the modulus of LBHI (0.82395 GPa) using the strain range of 0.1 – 0.15. Actually, the modulus of LBHI at the initial strain range of 0 – 0.05 can better reflect the intrinsic modulus, which is smaller than that of LPSI (0.76741 GPa).

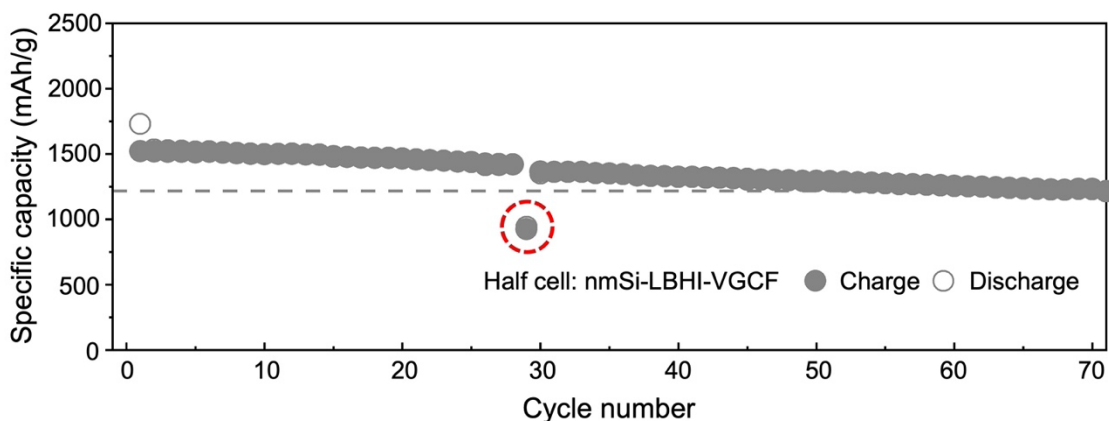

Figure S18. Long-term cycling performance of Si || Li-In half cell using nmSi composite anode. The mass ratio of nanosized Si, LBHI, and VGCF is 6:4:1. The dashed line indicates 80% of the first charge capacity. The current value is 210 mA/g<sub>Si</sub> and the voltage range is 0.05 – 1.5 V vs. Li<sup>+</sup>/Li (or -0.55 – 0.9 V vs. Li-In) at 60 °C. This half cell can retain 80% initial charge capacity for 71 cycles. The low ICE of 87.9% and low initial specific capacities should be caused by the much higher specific surface area of nanosized Si particles. Surficial silicon oxides hinder the conduction of ions and electrons. Moreover, silicon oxides lead to the irreversible consumption of lithium. And the particle size of LBHI can be further reduced to optimize the microstructure of the nmSi-LBHI-VGCF composite. The data indicated by the red circle was caused by the decreased temperature during the discharge process.

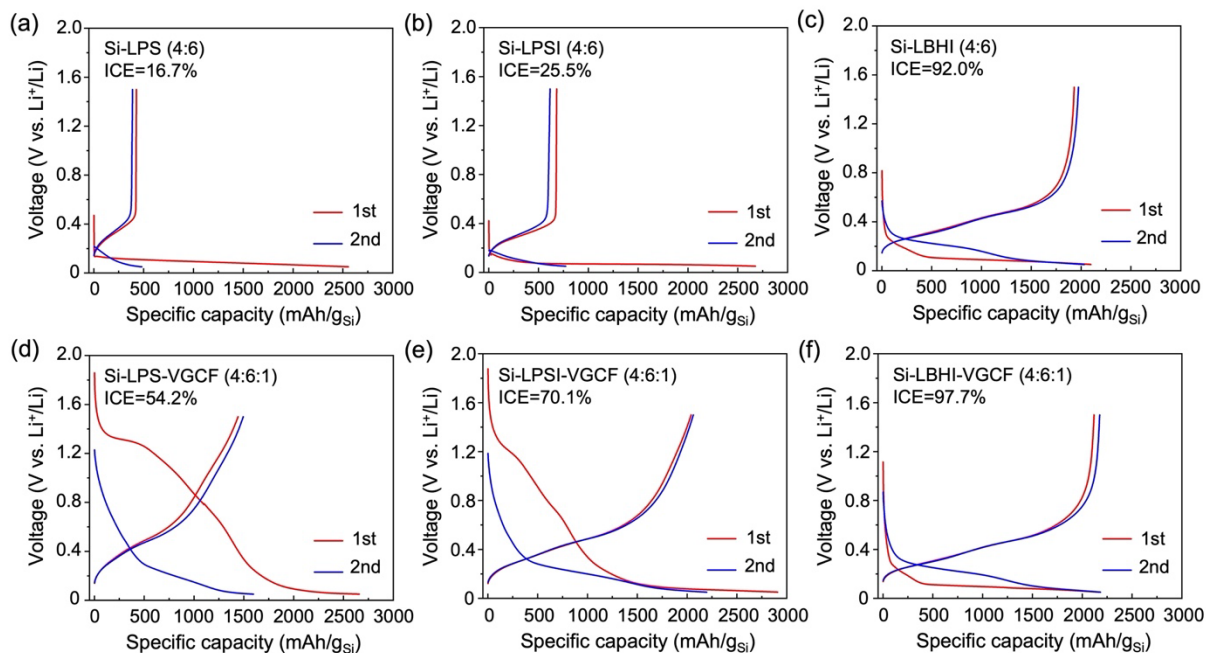

Figure S19. Voltage profiles of Si || Li-In half cells. The Si anode composites, (a) Si-LPS, (b) Si-LPSI, (c) Si-LBHI, (d) Si-LPS-VGCF, (e) Si-LPSI-VGCF, and (f) Si-LBHI-VGCF were prepared by ball milling Si and SE in a mass ratio of 4:6 for (a-c) or by ball milling Si, SE, and VGCF in a mass ratio of 4:6:1 for (d-f). These half cells were made by the same procedure as Figure 2(a-c) with an electrode mass of 4.55 mg Si-SE for (a-c) or 5 mg Si-SE-VGCF for (d-f). The current is 0.382 mA (*i.e.*, 210mA/g<sub>Si</sub>) and the voltage range is 0.05 – 1.5 V vs. Li<sup>+</sup>/Li (or -0.55 – 0.9 V vs. Li-In) at 60 °C.

## References

1. A. J. Bard, L. R. Faulkner and H. S. White, *Electrochemical Methods: Fundamentals and Applications*, John Wiley & Sons, 2022.
2. H. Zhang, P. Zong, M. Chen, H. Jin, Y. Bai, S. Li, F. Ma, H. Xu and K. Lian, *ACS Nano*, 2019, **13**, 3054-3062.
3. H. Xu, Y. Wang, R. Chen, Y. Bai, T. Li, H. Jin, J. Wang and H. Xia, *Carbon*, 2020, **157**, 330-339.
4. J. H. Park, H. Yoon, Y. Cho and C.-Y. Yoo, *Materials*, 2021, **14**, 4683.
5. Y. Du, Z. Yi, Z. Zhang, J. Liao, Y. Xu, J. Bao and X. Zhou, *Chemical Engineering Journal*, 2022, **435**, 135100.
6. Y. Hu, B. Wu, H. Yi, L. Hu, R. Wang, J. Shen and B. Wang, *The Journal of Physical Chemistry C*, 2022.
7. D. Liang, Y. Lu, L. Hu, L. Wang, S. Liang, X. Liang, L. Liu, Z. Xu, C. Han and C. Liang, *Journal of Power Sources*, 2022, **544**, 231897.

Table S1. Summary of calculated electrochemical stability between Si and LPS

| Voltage (V vs. Li/Li+) | Ratio, Si/LPS | Molar ratio, Si/(Si+LPS) | Reaction products                   | $E_{rxn}$ (eV/atom) |
|------------------------|---------------|--------------------------|-------------------------------------|---------------------|
| 1.49(→1.28)            | 0             | 0                        | P, Li <sub>2</sub> S                | -0.218              |
|                        | 1/2           | 1/3=33.3%                | Li <sub>2</sub> S, SiP <sub>2</sub> | -0.232              |
|                        | 1/1           | 1/2=50%                  | Li <sub>2</sub> S, SiP              | -0.227              |
| 1.48                   | 0             | 0                        | P, Li <sub>2</sub> S                | -0.228              |
|                        | 1/2           | 1/3=33.3%                | Li <sub>2</sub> S, SiP <sub>2</sub> | -0.241              |
|                        | 1/1           | 1/2=50%                  | Li <sub>2</sub> S, SiP              | -0.235              |
| 1.47                   | 0             | 0                        | P, Li <sub>2</sub> S                | -0.238              |
|                        | 1/2           | 1/3=33.3%                | Li <sub>2</sub> S, SiP <sub>2</sub> | -0.25               |
|                        | 1/1           | 1/2=50%                  | Li <sub>2</sub> S, SiP              | -0.243              |
| 1.46                   | 0             | 0                        | P, Li <sub>2</sub> S                | -0.248              |
|                        | 1/2           | 1/3=33.3%                | Li <sub>2</sub> S, SiP <sub>2</sub> | -0.259              |
|                        | 1/1           | 1/2=50%                  | Li <sub>2</sub> S, SiP              | -0.252              |
| 1.45                   | 0             | 0                        | P, Li <sub>2</sub> S                | -0.258              |
|                        | 1/2           | 1/3=33.3%                | Li <sub>2</sub> S, SiP <sub>2</sub> | -0.269              |
|                        | 1/1           | 1/2=50%                  | Li <sub>2</sub> S, SiP              | -0.26               |
| 1.44                   | 0             | 0                        | P, Li <sub>2</sub> S                | -0.268              |
|                        | 1/2           | 1/3=33.3%                | Li <sub>2</sub> S, SiP <sub>2</sub> | -0.278              |
|                        | 1/1           | 1/2=50%                  | Li <sub>2</sub> S, SiP              | -0.268              |
| 1.43                   | 0             | 0                        | P, Li <sub>2</sub> S                | -0.278              |
|                        | 1/2           | 1/3=33.3%                | Li <sub>2</sub> S, SiP <sub>2</sub> | -0.287              |
|                        | 1/1           | 1/2=50%                  | Li <sub>2</sub> S, SiP              | -0.277              |
| 1.42                   | 0             | 0                        | P, Li <sub>2</sub> S                | -0.288              |
|                        | 1/2           | 1/3=33.3%                | Li <sub>2</sub> S, SiP <sub>2</sub> | -0.296              |
|                        | 1/1           | 1/2=50%                  | Li <sub>2</sub> S, SiP              | -0.285              |
| 1.41                   | 0             | 0                        | P, Li <sub>2</sub> S                | -0.298              |
|                        | 1/2           | 1/3=33.3%                | Li <sub>2</sub> S, SiP <sub>2</sub> | -0.305              |
|                        | 1/1           | 1/2=50%                  | Li <sub>2</sub> S, SiP              | -0.293              |
| 1.40                   | 0             | 0                        | P, Li <sub>2</sub> S                | -0.308              |
|                        | 1/2           | 1/3=33.3%                | Li <sub>2</sub> S, SiP <sub>2</sub> | -0.314              |
|                        | 1/1           | 1/2=50%                  | Li <sub>2</sub> S, SiP              | -0.302              |
| 1.39                   | 0             | 0                        | P, Li <sub>2</sub> S                | -0.318              |
|                        | 1/2           | 1/3=33.3%                | Li <sub>2</sub> S, SiP <sub>2</sub> | -0.323              |
|                        | 1/1           | 1/2=50%                  | Li <sub>2</sub> S, SiP              | -0.31               |
| 1.38                   | 0             | 0                        | P, Li <sub>2</sub> S                | -0.328              |
|                        | 1/2           | 1/3=33.3%                | Li <sub>2</sub> S, SiP <sub>2</sub> | -0.332              |
|                        | 1/1           | 1/2=50%                  | Li <sub>2</sub> S, SiP              | -0.318              |
| 1.37                   | 0             | 0                        | P, Li <sub>2</sub> S                | -0.338              |
|                        | 1/2           | 1/3=33.3%                | Li <sub>2</sub> S, SiP <sub>2</sub> | -0.341              |
|                        | 1/1           | 1/2=50%                  | Li <sub>2</sub> S, SiP              | -0.327              |



|             |     |           |                                      |        |
|-------------|-----|-----------|--------------------------------------|--------|
| 1.36        | 0   | 0         | P, Li <sub>2</sub> S                 | -0.348 |
|             | 1/2 | 1/3=33.3% | Li <sub>2</sub> S, SiP <sub>2</sub>  | -0.35  |
|             | 1/1 | 1/2=50%   | Li <sub>2</sub> S, SiP               | -0.335 |
| 1.35        | 0   | 0         | P, Li <sub>2</sub> S                 | -0.358 |
|             | 1/2 | 1/3=33.3% | Li <sub>2</sub> S, SiP <sub>2</sub>  | -0.359 |
|             | 1/1 | 1/2=50%   | Li <sub>2</sub> S, SiP               | -0.343 |
| 1.34        | 0   | 0         | P, Li <sub>2</sub> S                 | -0.368 |
|             | 1/2 | 1/3=33.3% | Li <sub>2</sub> S, SiP <sub>2</sub>  | -0.369 |
|             | 1/1 | 1/2=50%   | Li <sub>2</sub> S, SiP               | -0.352 |
| 1.33        | 0   | 0         | P, Li <sub>2</sub> S                 | -0.378 |
|             | 1/2 | 1/3=33.3% | Li <sub>2</sub> S, SiP <sub>2</sub>  | -0.378 |
|             | 1/1 | 1/2=50%   | Li <sub>2</sub> S, SiP               | -0.36  |
| 1.32        | 0   | 0         | P, Li <sub>2</sub> S                 | -0.388 |
|             | 1/2 | 1/3=33.3% | Li <sub>2</sub> S, SiP <sub>2</sub>  | -0.387 |
|             | 1/1 | 1/2=50%   | Li <sub>2</sub> S, SiP               | -0.368 |
| 1.31        | 0   | 0         | P, Li <sub>2</sub> S                 | -0.398 |
|             | 1/2 | 1/3=33.3% | Li <sub>2</sub> S, SiP <sub>2</sub>  | -0.396 |
|             | 1/1 | 1/2=50%   | Li <sub>2</sub> S, SiP               | -0.377 |
| 1.30        | 0   | 0         | P, Li <sub>2</sub> S                 | -0.408 |
|             | 1/2 | 1/3=33.3% | Li <sub>2</sub> S, SiP <sub>2</sub>  | -0.405 |
|             | 1/1 | 1/2=50%   | Li <sub>2</sub> S, SiP               | -0.385 |
| 1.29        | 0   | 0         | P, Li <sub>2</sub> S                 | -0.418 |
|             | 1/2 | 1/3=33.3% | Li <sub>2</sub> S, SiP <sub>2</sub>  | -0.414 |
|             | 1/1 | 1/2=50%   | Li <sub>2</sub> S, SiP               | -0.393 |
| 1.28        | 0   | 0         | P, Li <sub>2</sub> S                 | -0.428 |
|             | 1/2 | 1/3=33.3% | Li <sub>2</sub> S, SiP <sub>2</sub>  | -0.423 |
|             | 1/1 | 1/2=50%   | Li <sub>2</sub> S, SiP               | -0.402 |
| 1.27(→1.17) | 0   | 0         | LiP <sub>7</sub> , Li <sub>2</sub> S | -0.438 |
|             | 1/2 | 1/3=33.3% | Li <sub>2</sub> S, SiP <sub>2</sub>  | -0.432 |
|             | 1/1 | 1/2=50%   | Li <sub>2</sub> S, SiP               | -0.41  |
| 1.26        | 0   | 0         | LiP <sub>7</sub> , Li <sub>2</sub> S | -0.448 |
|             | 1/2 | 1/3=33.3% | Li <sub>2</sub> S, SiP <sub>2</sub>  | -0.441 |
|             | 1/1 | 1/2=50%   | Li <sub>2</sub> S, SiP               | -0.418 |
| 1.25        | 0   | 0         | LiP <sub>7</sub> , Li <sub>2</sub> S | -0.458 |
|             | 1/2 | 1/3=33.3% | Li <sub>2</sub> S, SiP <sub>2</sub>  | -0.45  |
|             | 1/1 | 1/2=50%   | Li <sub>2</sub> S, SiP               | -0.427 |
| 1.24        | 0   | 0         | LiP <sub>7</sub> , Li <sub>2</sub> S | -0.469 |
|             | 1/2 | 1/3=33.3% | Li <sub>2</sub> S, SiP <sub>2</sub>  | -0.459 |
|             | 1/1 | 1/2=50%   | Li <sub>2</sub> S, SiP               | -0.435 |
| 1.23        | 0   | 0         | LiP <sub>7</sub> , Li <sub>2</sub> S | -0.479 |
|             | 1/2 | 1/3=33.3% | Li <sub>2</sub> S, SiP <sub>2</sub>  | -0.469 |
|             | 1/1 | 1/2=50%   | Li <sub>2</sub> S, SiP               | -0.443 |

|             |     |           |             |        |
|-------------|-----|-----------|-------------|--------|
| 1.22        | 0   | 0         | LiP7, Li2S  | -0.489 |
|             | 1/2 | 1/3=33.3% | Li2S, SiP2  | -0.478 |
|             | 1/1 | 1/2=50%   | Li2S, SiP   | -0.452 |
| 1.21        | 0   | 0         | LiP7, Li2S  | -0.499 |
|             | 1/2 | 1/3=33.3% | Li2S, SiP2  | -0.487 |
|             | 1/1 | 1/2=50%   | Li2S, SiP   | -0.46  |
| 1.20        | 0   | 0         | LiP7, Li2S  | -0.51  |
|             | 1/2 | 1/3=33.3% | Li2S, SiP2  | -0.496 |
|             | 1/1 | 1/2=50%   | Li2S, SiP   | -0.468 |
| 1.19        | 0   | 0         | LiP7, Li2S  | -0.52  |
|             | 1/2 | 1/3=33.3% | Li2S, SiP2  | -0.505 |
|             | 1/1 | 1/2=50%   | Li2S, SiP   | -0.477 |
| 1.18        | 0   | 0         | LiP7, Li2S  | -0.53  |
|             | 1/2 | 1/3=33.3% | Li2S, SiP2  | -0.514 |
|             | 1/1 | 1/2=50%   | Li2S, SiP   | -0.485 |
| 1.17        | 0   | 0         | LiP7, Li2S  | -0.541 |
|             | 1/2 | 1/3=33.3% | Li2S, SiP2  | -0.523 |
|             | 1/1 | 1/2=50%   | Li2S, SiP   | -0.493 |
| 1.16(→0.97) | 0   | 0         | Li3P7, Li2S | -0.551 |
|             | 1/2 | 1/3=33.3% | Li2S, SiP2  | -0.532 |
|             | 1/1 | 1/2=50%   | Li2S, SiP   | -0.502 |
| 1.15        | 0   | 0         | Li3P7, Li2S | -0.562 |
|             | 1/2 | 1/3=33.3% | Li2S, SiP2  | -0.541 |
|             | 1/1 | 1/2=50%   | Li2S, SiP   | -0.51  |
| 1.14        | 0   | 0         | Li3P7, Li2S | -0.573 |
|             | 1/2 | 1/3=33.3% | Li2S, SiP2  | -0.55  |
|             | 1/1 | 1/2=50%   | Li2S, SiP   | -0.518 |
| 1.13        | 0   | 0         | Li3P7, Li2S | -0.584 |
|             | 1/2 | 1/3=33.3% | Li2S, SiP2  | -0.559 |
|             | 1/1 | 1/2=50%   | Li2S, SiP   | -0.527 |
| 1.12        | 0   | 0         | Li3P7, Li2S | -0.594 |
|             | 1/2 | 1/3=33.3% | Li2S, SiP2  | -0.569 |
|             | 1/1 | 1/2=50%   | Li2S, SiP   | -0.535 |
| 1.11        | 0   | 0         | Li3P7, Li2S | -0.605 |
|             | 1/2 | 1/3=33.3% | Li2S, SiP2  | -0.578 |
|             | 1/1 | 1/2=50%   | Li2S, SiP   | -0.543 |
| 1.10        | 0   | 0         | Li3P7, Li2S | -0.616 |
|             | 1/2 | 1/3=33.3% | Li2S, SiP2  | -0.587 |
|             | 1/1 | 1/2=50%   | Li2S, SiP   | -0.552 |
| 1.09        | 0   | 0         | Li3P7, Li2S | -0.627 |
|             | 1/2 | 1/3=33.3% | Li2S, SiP2  | -0.596 |
|             | 1/1 | 1/2=50%   | Li2S, SiP   | -0.56  |

|             |     |           |               |        |
|-------------|-----|-----------|---------------|--------|
| 1.08        | 0   | 0         | Li3P7, Li2S   | -0.638 |
|             | 1/2 | 1/3=33.3% | Li2S, SiP2    | -0.605 |
|             | 1/1 | 1/2=50%   | Li2S, SiP     | -0.568 |
| 1.07        | 0   | 0         | Li3P7, Li2S   | -0.649 |
|             | 1/2 | 1/3=33.3% | Li2S, SiP2    | -0.614 |
|             | 1/1 | 1/2=50%   | Li2S, SiP     | -0.577 |
| 1.06        | 0   | 0         | Li3P7, Li2S   | -0.66  |
|             | 1/2 | 1/3=33.3% | Li2S, SiP2    | -0.623 |
|             | 1/1 | 1/2=50%   | Li2S, SiP     | -0.585 |
| 1.05        | 0   | 0         | Li3P7, Li2S   | -0.67  |
|             | 1/2 | 1/3=33.3% | Li2S, SiP2    | -0.632 |
|             | 1/1 | 1/2=50%   | Li2S, SiP     | -0.593 |
| 1.04        | 0   | 0         | Li3P7, Li2S   | -0.681 |
|             | 1/2 | 1/3=33.3% | Li2S, SiP2    | -0.641 |
|             | 1/1 | 1/2=50%   | Li2S, SiP     | -0.602 |
| 1.03        | 0   | 0         | Li3P7, Li2S   | -0.692 |
|             | 1/2 | 1/3=33.3% | Li2S, SiP2    | -0.65  |
|             | 1/1 | 1/2=50%   | Li2S, SiP     | -0.61  |
| 1.02        | 0   | 0         | Li3P7, Li2S   | -0.703 |
|             | 1/2 | 1/3=33.3% | Li2S, SiP2    | -0.659 |
|             | 1/1 | 1/2=50%   | Li2S, SiP     | -0.618 |
| 1.01        | 0   | 0         | Li3P7, Li2S   | -0.714 |
|             | 1/2 | 1/3=33.3% | Li2S, SiP2    | -0.669 |
|             | 1/1 | 1/2=50%   | Li2S, SiP     | -0.627 |
| 1.00        | 0   | 0         | Li3P7, Li2S   | -0.725 |
|             | 1/2 | 1/3=33.3% | Li2S, SiP2    | -0.678 |
|             | 1/1 | 1/2=50%   | Li2S, SiP     | -0.635 |
| 0.99        | 0   | 0         | Li3P7, Li2S   | -0.736 |
|             | 1/2 | 1/3=33.3% | Li2S, SiP2    | -0.687 |
|             | 1/1 | 1/2=50%   | Li2S, SiP     | -0.643 |
| 0.98        | 0   | 0         | Li3P7, Li2S   | -0.746 |
|             | 1/2 | 1/3=33.3% | Li2S, SiP2    | -0.696 |
|             | 1/1 | 1/2=50%   | Li2S, SiP     | -0.652 |
| 0.97        | 0   | 0         | Li3P7, Li2S   | -0.757 |
|             | 1/2 | 1/3=33.3% | Li2S, SiP2    | -0.705 |
|             | 1/1 | 1/2=50%   | Li2S, SiP     | -0.66  |
| 0.96(→0.94) | 0   | 0         | Li3P7, Li2S   | -0.768 |
|             | 1/3 | 1/4=25%   | Li2S, Li5SiP3 | -0.733 |
|             | 1/1 | 1/2=50%   | Li2S, SiP     | -0.668 |
| 0.95        | 0   | 0         | Li3P7, Li2S   | -0.779 |
|             | 1/3 | 1/4=25%   | Li2S, Li5SiP3 | -0.746 |
|             | 1/1 | 1/2=50%   | Li2S, SiP     | -0.677 |

|             |     |         |               |        |
|-------------|-----|---------|---------------|--------|
| 0.94        | 0   | 0       | Li3P7, Li2S   | -0.79  |
|             | 1/3 | 1/4=25% | Li2S, Li5SiP3 | -0.758 |
|             | 1/1 | 1/2=50% | Li2S, SiP     | -0.685 |
| 0.93(→0.91) | 0   | 0       | LiP, Li2S     | -0.801 |
|             | 1/3 | 1/4=25% | Li2S, Li5SiP3 | -0.771 |
|             | 1/1 | 1/2=50% | Li2S, SiP     | -0.693 |
| 0.92        | 0   | 0       | LiP, Li2S     | -0.813 |
|             | 1/3 | 1/4=25% | Li2S, Li5SiP3 | -0.783 |
|             | 1/1 | 1/2=50% | Li2S, SiP     | -0.702 |
| 0.91        | 0   | 0       | LiP, Li2S     | -0.825 |
|             | 1/3 | 1/4=25% | Li2S, Li5SiP3 | -0.796 |
|             | 1/1 | 1/2=50% | Li2S, SiP     | -0.71  |
| 0.90(→0.87) | 0   | 0       | LiP, Li2S     | -0.837 |
|             | 1/3 | 1/4=25% | Li2S, Li5SiP3 | -0.808 |
| 0.89        | 0   | 0       | LiP, Li2S     | -0.849 |
|             | 1/3 | 1/4=25% | Li2S, Li5SiP3 | -0.821 |
| 0.88        | 0   | 0       | LiP, Li2S     | -0.861 |
|             | 1/3 | 1/4=25% | Li2S, Li5SiP3 | -0.833 |
| 0.87        | 0   | 0       | LiP, Li2S     | -0.873 |
|             | 1/3 | 1/4=25% | Li2S, Li5SiP3 | -0.846 |
| 0.86(→0.76) | 0   | 0       | Li3P, Li2S    | -0.889 |
|             | 1/3 | 1/4=25% | Li2S, Li5SiP3 | -0.858 |
| 0.85        | 0   | 0       | Li3P, Li2S    | -0.905 |
|             | 1/3 | 1/4=25% | Li2S, Li5SiP3 | -0.871 |
| 0.84        | 0   | 0       | Li3P, Li2S    | -0.921 |
|             | 1/3 | 1/4=25% | Li2S, Li5SiP3 | -0.883 |
| 0.83        | 0   | 0       | Li3P, Li2S    | -0.937 |
|             | 1/3 | 1/4=25% | Li2S, Li5SiP3 | -0.896 |
| 0.82        | 0   | 0       | Li3P, Li2S    | -0.953 |
|             | 1/3 | 1/4=25% | Li2S, Li5SiP3 | -0.908 |
| 0.81        | 0   | 0       | Li3P, Li2S    | -0.969 |
|             | 1/3 | 1/4=25% | Li2S, Li5SiP3 | -0.921 |
| 0.80        | 0   | 0       | Li3P, Li2S    | -0.985 |
|             | 1/3 | 1/4=25% | Li2S, Li5SiP3 | -0.933 |
| 0.79        | 0   | 0       | Li3P, Li2S    | -1.001 |
|             | 1/3 | 1/4=25% | Li2S, Li5SiP3 | -0.946 |
| 0.78        | 0   | 0       | Li3P, Li2S    | -1.017 |
|             | 1/3 | 1/4=25% | Li2S, Li5SiP3 | -0.958 |
| 0.77        | 0   | 0       | Li3P, Li2S    | -1.033 |
|             | 1/3 | 1/4=25% | Li2S, Li5SiP3 | -0.971 |
| 0.76        | 0   | 0       | Li3P, Li2S    | -1.049 |
|             | 1/3 | 1/4=25% | Li2S, Li5SiP3 | -0.983 |

|             |   |   |            |        |
|-------------|---|---|------------|--------|
| 0.75(→0.40) | 0 | 0 | Li3P, Li2S | -1.065 |
| 0.74        | 0 | 0 | Li3P, Li2S | -1.081 |
| 0.73        | 0 | 0 | Li3P, Li2S | -1.097 |
| 0.72        | 0 | 0 | Li3P, Li2S | -1.113 |
| 0.71        | 0 | 0 | Li3P, Li2S | -1.129 |
| 0.7         | 0 | 0 | Li3P, Li2S | -1.145 |
| 0.69        | 0 | 0 | Li3P, Li2S | -1.161 |
| 0.68        | 0 | 0 | Li3P, Li2S | -1.177 |
| 0.67        | 0 | 0 | Li3P, Li2S | -1.193 |
| 0.66        | 0 | 0 | Li3P, Li2S | -1.209 |
| 0.65        | 0 | 0 | Li3P, Li2S | -1.225 |
| 0.64        | 0 | 0 | Li3P, Li2S | -1.241 |
| 0.63        | 0 | 0 | Li3P, Li2S | -1.257 |
| 0.62        | 0 | 0 | Li3P, Li2S | -1.273 |
| 0.61        | 0 | 0 | Li3P, Li2S | -1.289 |
| 0.6         | 0 | 0 | Li3P, Li2S | -1.305 |
| 0.59        | 0 | 0 | Li3P, Li2S | -1.321 |
| 0.58        | 0 | 0 | Li3P, Li2S | -1.337 |
| 0.57        | 0 | 0 | Li3P, Li2S | -1.353 |
| 0.56        | 0 | 0 | Li3P, Li2S | -1.369 |
| 0.55        | 0 | 0 | Li3P, Li2S | -1.385 |
| 0.54        | 0 | 0 | Li3P, Li2S | -1.401 |
| 0.53        | 0 | 0 | Li3P, Li2S | -1.417 |
| 0.52        | 0 | 0 | Li3P, Li2S | -1.433 |
| 0.51        | 0 | 0 | Li3P, Li2S | -1.449 |
| 0.5         | 0 | 0 | Li3P, Li2S | -1.465 |
| 0.49        | 0 | 0 | Li3P, Li2S | -1.481 |
| 0.48        | 0 | 0 | Li3P, Li2S | -1.497 |
| 0.47        | 0 | 0 | Li3P, Li2S | -1.513 |
| 0.46        | 0 | 0 | Li3P, Li2S | -1.529 |
| 0.45        | 0 | 0 | Li3P, Li2S | -1.545 |
| 0.44        | 0 | 0 | Li3P, Li2S | -1.561 |
| 0.43        | 0 | 0 | Li3P, Li2S | -1.577 |
| 0.42        | 0 | 0 | Li3P, Li2S | -1.593 |
| 0.41        | 0 | 0 | Li3P, Li2S | -1.609 |
| 0.4         | 0 | 0 | Li3P, Li2S | -1.625 |
| 0.39        | 0 | 0 | Li3P, Li2S | -1.641 |
|             |   | 1 | LiSi       | -0.007 |
| 0.38(→0.37) | 0 | 0 | Li3P, Li2S | -1.657 |
|             |   | 1 | Li12Si7    | -0.024 |
| 0.37        | 0 | 0 | Li3P, Li2S | -1.673 |
|             |   | 1 | Li12Si7    | -0.041 |

|             |   |   |            |        |
|-------------|---|---|------------|--------|
| 0.36(→0.18) | 0 | 0 | Li3P, Li2S | -1.689 |
|             |   | 1 | Li7Si3     | -0.064 |
| 0.35        | 0 | 0 | Li3P, Li2S | -1.705 |
|             |   | 1 | Li7Si3     | -0.087 |
| 0.34        | 0 | 0 | Li3P, Li2S | -1.721 |
|             |   | 1 | Li7Si3     | -0.11  |
| 0.33        | 0 | 0 | Li3P, Li2S | -1.737 |
|             |   | 1 | Li7Si3     | -0.134 |
| 0.32        | 0 | 0 | Li3P, Li2S | -1.753 |
|             |   | 1 | Li7Si3     | -0.157 |
| 0.31        | 0 | 0 | Li3P, Li2S | -1.769 |
|             |   | 1 | Li7Si3     | -0.18  |
| 0.3         | 0 | 0 | Li3P, Li2S | -1.785 |
|             |   | 1 | Li7Si3     | -0.204 |
| 0.29        | 0 | 0 | Li3P, Li2S | -1.801 |
|             |   | 1 | Li7Si3     | -0.227 |
| 0.28        | 0 | 0 | Li3P, Li2S | -1.817 |
|             |   | 1 | Li7Si3     | -0.25  |
| 0.27        | 0 | 0 | Li3P, Li2S | -1.833 |
|             |   | 1 | Li7Si3     | -0.274 |
| 0.26        | 0 | 0 | Li3P, Li2S | -1.849 |
|             |   | 1 | Li7Si3     | -0.297 |
| 0.25        | 0 | 0 | Li3P, Li2S | -1.865 |
|             |   | 1 | Li7Si3     | -0.32  |
| 0.24        | 0 | 0 | Li3P, Li2S | -1.881 |
|             |   | 1 | Li7Si3     | -0.344 |
| 0.23        | 0 | 0 | Li3P, Li2S | -1.897 |
|             |   | 1 | Li7Si3     | -0.367 |
| 0.22        | 0 | 0 | Li3P, Li2S | -1.913 |
|             |   | 1 | Li7Si3     | -0.39  |
| 0.21        | 0 | 0 | Li3P, Li2S | -1.929 |
|             |   | 1 | Li7Si3     | -0.414 |
| 0.2         | 0 | 0 | Li3P, Li2S | -1.945 |
|             |   | 1 | Li7Si3     | -0.437 |
| 0.19        | 0 | 0 | Li3P, Li2S | -1.961 |
|             |   | 1 | Li7Si3     | -0.46  |
| 0.18        | 0 | 0 | Li3P, Li2S | -1.977 |
|             |   | 1 | Li7Si3     | -0.484 |
| 0.17(→0.13) | 0 | 0 | Li3P, Li2S | -1.993 |
|             |   | 1 | Li13Si4    | -0.515 |
| 0.16        | 0 | 0 | Li3P, Li2S | -2.009 |
|             |   | 1 | Li13Si4    | -0.548 |

|                        |   |   |                  |        |
|------------------------|---|---|------------------|--------|
| 0.15                   | 0 | 0 | Li3P, Li2S       | -2.025 |
|                        |   | 1 | Li13Si4          | -0.58  |
| 0.14                   | 0 | 0 | Li3P, Li2S       | -2.041 |
|                        |   | 1 | Li13Si4          | -0.613 |
| 0.13                   | 0 | 0 | Li3P, Li2S       | -2.057 |
|                        |   | 1 | Li13Si4          | -0.645 |
| 0.12( $\rightarrow$ 0) | 0 | 0 | Li3P, Li2S       | -2.073 |
|                        |   | 1 | Li21Si5 (dashed) | -0.679 |
| 0.11                   | 0 | 0 | Li3P, Li2S       | -2.089 |
|                        |   | 1 | Li21Si5 (dashed) | -0.721 |
| 0.1                    | 0 | 0 | Li3P, Li2S       | -2.105 |
|                        |   | 1 | Li21Si5 (dashed) | -0.763 |
| 0.09                   | 0 | 0 | Li3P, Li2S       | -2.121 |
|                        |   | 1 | Li21Si5 (dashed) | -0.805 |
| 0.08                   | 0 | 0 | Li3P, Li2S       | -2.137 |
|                        |   | 1 | Li21Si5 (dashed) | -0.847 |
| 0.07                   | 0 | 0 | Li3P, Li2S       | -2.153 |
|                        |   | 1 | Li21Si5 (dashed) | -0.889 |
| 0.06                   | 0 | 0 | Li3P, Li2S       | -2.169 |
|                        |   | 1 | Li21Si5 (dashed) | -0.931 |
| 0.05                   | 0 | 0 | Li3P, Li2S       | -2.185 |
|                        |   | 1 | Li21Si5 (dashed) | -0.973 |
| 0.04                   | 0 | 0 | Li3P, Li2S       | -2.201 |
|                        |   | 1 | Li21Si5 (dashed) | -1.015 |
| 0.03                   | 0 | 0 | Li3P, Li2S       | -2.217 |
|                        |   | 1 | Li21Si5 (dashed) | -1.057 |
| 0.02                   | 0 | 0 | Li3P, Li2S       | -2.233 |
|                        |   | 1 | Li21Si5 (dashed) | -1.099 |
| 0.01                   | 0 | 0 | Li3P, Li2S       | -2.249 |
|                        |   | 1 | Li21Si5 (dashed) | -1.141 |
| 0                      | 0 | 0 | Li3P, Li2S       | -2.265 |
|                        |   | 1 | Li21Si5 (dashed) | -1.183 |

Table S2. Summary of calculated electrochemical stability between Si and LPSI

| Voltage (V vs. Li/Li+) | Ratio, Si/LPSI | Molar ratio, Si/(Si+LPSI) | Reaction products                         | $E_{rxn}$ (eV/atom) |
|------------------------|----------------|---------------------------|-------------------------------------------|---------------------|
| 1.49(→1.28)            | 0              | 0                         | P, Li <sub>2</sub> S, LiI                 | -0.186              |
|                        | 7/2            | 7/9=77.8%                 | Li <sub>2</sub> S, SiP <sub>2</sub> , LiI | -0.201              |
|                        | 7/1            | 7/8=87.5%                 | Li <sub>2</sub> S, SiP, LiI               | -0.198              |
| 1.48                   | 0              | 0                         | P, Li <sub>2</sub> S, LiI                 | -0.194              |
|                        | 7/2            | 7/9=77.8%                 | Li <sub>2</sub> S, SiP <sub>2</sub> , LiI | -0.209              |
|                        | 7/1            | 7/8=87.5%                 | Li <sub>2</sub> S, SiP, LiI               | -0.206              |
| 1.47                   | 0              | 0                         | P, Li <sub>2</sub> S, LiI                 | -0.203              |
|                        | 7/2            | 7/9=77.8%                 | Li <sub>2</sub> S, SiP <sub>2</sub> , LiI | -0.217              |
|                        | 7/1            | 7/8=87.5%                 | Li <sub>2</sub> S, SiP, LiI               | -0.213              |
| 1.46                   | 0              | 0                         | P, Li <sub>2</sub> S, LiI                 | -0.211              |
|                        | 7/2            | 7/9=77.8%                 | Li <sub>2</sub> S, SiP <sub>2</sub> , LiI | -0.224              |
|                        | 7/1            | 7/8=87.5%                 | Li <sub>2</sub> S, SiP, LiI               | -0.22               |
| 1.45                   | 0              | 0                         | P, Li <sub>2</sub> S, LiI                 | -0.22               |
|                        | 7/2            | 7/9=77.8%                 | Li <sub>2</sub> S, SiP <sub>2</sub> , LiI | -0.232              |
|                        | 7/1            | 7/8=87.5%                 | Li <sub>2</sub> S, SiP, LiI               | -0.228              |
| 1.44                   | 0              | 0                         | P, Li <sub>2</sub> S, LiI                 | -0.228              |
|                        | 7/2            | 7/9=77.8%                 | Li <sub>2</sub> S, SiP <sub>2</sub> , LiI | -0.24               |
|                        | 7/1            | 7/8=87.5%                 | Li <sub>2</sub> S, SiP, LiI               | -0.235              |
| 1.43                   | 0              | 0                         | P, Li <sub>2</sub> S, LiI                 | -0.237              |
|                        | 7/2            | 7/9=77.8%                 | Li <sub>2</sub> S, SiP <sub>2</sub> , LiI | -0.248              |
|                        | 7/1            | 7/8=87.5%                 | Li <sub>2</sub> S, SiP, LiI               | -0.242              |
| 1.42                   | 0              | 0                         | P, Li <sub>2</sub> S, LiI                 | -0.246              |
|                        | 7/2            | 7/9=77.8%                 | Li <sub>2</sub> S, SiP <sub>2</sub> , LiI | -0.256              |
|                        | 7/1            | 7/8=87.5%                 | Li <sub>2</sub> S, SiP, LiI               | -0.249              |
| 1.41                   | 0              | 0                         | P, Li <sub>2</sub> S, LiI                 | -0.254              |
|                        | 7/2            | 7/9=77.8%                 | Li <sub>2</sub> S, SiP <sub>2</sub> , LiI | -0.264              |
|                        | 7/1            | 7/8=87.5%                 | Li <sub>2</sub> S, SiP, LiI               | -0.257              |
| 1.40                   | 0              | 0                         | P, Li <sub>2</sub> S, LiI                 | -0.263              |
|                        | 7/2            | 7/9=77.8%                 | Li <sub>2</sub> S, SiP <sub>2</sub> , LiI | -0.272              |
|                        | 7/1            | 7/8=87.5%                 | Li <sub>2</sub> S, SiP, LiI               | -0.264              |
| 1.39                   | 0              | 0                         | P, Li <sub>2</sub> S, LiI                 | -0.271              |
|                        | 7/2            | 7/9=77.8%                 | Li <sub>2</sub> S, SiP <sub>2</sub> , LiI | -0.28               |
|                        | 7/1            | 7/8=87.5%                 | Li <sub>2</sub> S, SiP, LiI               | -0.271              |
| 1.38                   | 0              | 0                         | P, Li <sub>2</sub> S, LiI                 | -0.28               |
|                        | 7/2            | 7/9=77.8%                 | Li <sub>2</sub> S, SiP <sub>2</sub> , LiI | -0.287              |
|                        | 7/1            | 7/8=87.5%                 | Li <sub>2</sub> S, SiP, LiI               | -0.279              |
| 1.37                   | 0              | 0                         | P, Li <sub>2</sub> S, LiI                 | -0.288              |
|                        | 7/2            | 7/9=77.8%                 | Li <sub>2</sub> S, SiP <sub>2</sub> , LiI | -0.295              |
|                        | 7/1            | 7/8=87.5%                 | Li <sub>2</sub> S, SiP, LiI               | -0.286              |



|             |     |           |                                           |        |
|-------------|-----|-----------|-------------------------------------------|--------|
| 1.36        | 0   | 0         | P, Li <sub>2</sub> S, Lil                 | -0.297 |
|             | 7/2 | 7/9=77.8% | Li <sub>2</sub> S, SiP <sub>2</sub> , Lil | -0.303 |
|             | 7/1 | 7/8=87.5% | Li <sub>2</sub> S, SiP, Lil               | -0.293 |
| 1.35        | 0   | 0         | P, Li <sub>2</sub> S, Lil                 | -0.305 |
|             | 7/2 | 7/9=77.8% | Li <sub>2</sub> S, SiP <sub>2</sub> , Lil | -0.311 |
|             | 7/1 | 7/8=87.5% | Li <sub>2</sub> S, SiP, Lil               | -0.301 |
| 1.34        | 0   | 0         | P, Li <sub>2</sub> S, Lil                 | -0.314 |
|             | 7/2 | 7/9=77.8% | Li <sub>2</sub> S, SiP <sub>2</sub> , Lil | -0.319 |
|             | 7/1 | 7/8=87.5% | Li <sub>2</sub> S, SiP, Lil               | -0.308 |
| 1.33        | 0   | 0         | P, Li <sub>2</sub> S, Lil                 | -0.322 |
|             | 7/2 | 7/9=77.8% | Li <sub>2</sub> S, SiP <sub>2</sub> , Lil | -0.327 |
|             | 7/1 | 7/8=87.5% | Li <sub>2</sub> S, SiP, Lil               | -0.315 |
| 1.32        | 0   | 0         | P, Li <sub>2</sub> S, Lil                 | -0.331 |
|             | 7/2 | 7/9=77.8% | Li <sub>2</sub> S, SiP <sub>2</sub> , Lil | -0.335 |
|             | 7/1 | 7/8=87.5% | Li <sub>2</sub> S, SiP, Lil               | -0.322 |
| 1.31        | 0   | 0         | P, Li <sub>2</sub> S, Lil                 | -0.339 |
|             | 7/2 | 7/9=77.8% | Li <sub>2</sub> S, SiP <sub>2</sub> , Lil | -0.342 |
|             | 7/1 | 7/8=87.5% | Li <sub>2</sub> S, SiP, Lil               | -0.33  |
| 1.30        | 0   | 0         | P, Li <sub>2</sub> S, Lil                 | -0.348 |
|             | 7/2 | 7/9=77.8% | Li <sub>2</sub> S, SiP <sub>2</sub> , Lil | -0.35  |
|             | 7/1 | 7/8=87.5% | Li <sub>2</sub> S, SiP, Lil               | -0.337 |
| 1.29        | 0   | 0         | P, Li <sub>2</sub> S, Lil                 | -0.357 |
|             | 7/2 | 7/9=77.8% | Li <sub>2</sub> S, SiP <sub>2</sub> , Lil | -0.358 |
|             | 7/1 | 7/8=87.5% | Li <sub>2</sub> S, SiP, Lil               | -0.344 |
| 1.28        | 0   | 0         | P, Li <sub>2</sub> S, Lil                 | -0.365 |
|             | 7/2 | 7/9=77.8% | Li <sub>2</sub> S, SiP <sub>2</sub> , Lil | -0.366 |
|             | 7/1 | 7/8=87.5% | Li <sub>2</sub> S, SiP, Lil               | -0.352 |
| 1.27(→1.17) | 0   | 0         | LiP <sub>7</sub> , Li <sub>2</sub> S, Lil | -0.374 |
|             | 7/2 | 7/9=77.8% | Li <sub>2</sub> S, SiP <sub>2</sub> , Lil | -0.374 |
|             | 7/1 | 7/8=87.5% | Li <sub>2</sub> S, SiP, Lil               | -0.359 |
| 1.26        | 0   | 0         | LiP <sub>7</sub> , Li <sub>2</sub> S, Lil | -0.382 |
|             | 7/2 | 7/9=77.8% | Li <sub>2</sub> S, SiP <sub>2</sub> , Lil | -0.382 |
|             | 7/1 | 7/8=87.5% | Li <sub>2</sub> S, SiP, Lil               | -0.366 |
| 1.25        | 0   | 0         | LiP <sub>7</sub> , Li <sub>2</sub> S, Lil | -0.391 |
|             | 7/2 | 7/9=77.8% | Li <sub>2</sub> S, SiP <sub>2</sub> , Lil | -0.39  |
|             | 7/1 | 7/8=87.5% | Li <sub>2</sub> S, SiP, Lil               | -0.373 |
| 1.24        | 0   | 0         | LiP <sub>7</sub> , Li <sub>2</sub> S, Lil | -0.4   |
|             | 7/2 | 7/9=77.8% | Li <sub>2</sub> S, SiP <sub>2</sub> , Lil | -0.397 |
|             | 7/1 | 7/8=87.5% | Li <sub>2</sub> S, SiP, Lil               | -0.381 |
| 1.23        | 0   | 0         | LiP <sub>7</sub> , Li <sub>2</sub> S, Lil | -0.409 |
|             | 7/2 | 7/9=77.8% | Li <sub>2</sub> S, SiP <sub>2</sub> , Lil | -0.405 |
|             | 7/1 | 7/8=87.5% | Li <sub>2</sub> S, SiP, Lil               | -0.388 |

|             |     |           |                  |        |
|-------------|-----|-----------|------------------|--------|
| 1.22        | 0   | 0         | LiP7, Li2S, Lil  | -0.418 |
|             | 7/2 | 7/9=77.8% | Li2S, SiP2, Lil  | -0.413 |
|             | 7/1 | 7/8=87.5% | Li2S, SiP, Lil   | -0.395 |
| 1.21        | 0   | 0         | LiP7, Li2S, Lil  | -0.426 |
|             | 7/2 | 7/9=77.8% | Li2S, SiP2, Lil  | -0.421 |
|             | 7/1 | 7/8=87.5% | Li2S, SiP, Lil   | -0.403 |
| 1.20        | 0   | 0         | LiP7, Li2S, Lil  | -0.435 |
|             | 7/2 | 7/9=77.8% | Li2S, SiP2, Lil  | -0.429 |
|             | 7/1 | 7/8=87.5% | Li2S, SiP, Lil   | -0.41  |
| 1.19        | 0   | 0         | LiP7, Li2S, Lil  | -0.444 |
|             | 7/2 | 7/9=77.8% | Li2S, SiP2, Lil  | -0.437 |
|             | 7/1 | 7/8=87.5% | Li2S, SiP, Lil   | -0.417 |
| 1.18        | 0   | 0         | LiP7, Li2S, Lil  | -0.453 |
|             | 7/2 | 7/9=77.8% | Li2S, SiP2, Lil  | -0.445 |
|             | 7/1 | 7/8=87.5% | Li2S, SiP, Lil   | -0.424 |
| 1.17        | 0   | 0         | LiP7, Li2S, Lil  | -0.461 |
|             | 7/2 | 7/9=77.8% | Li2S, SiP2, Lil  | -0.453 |
|             | 7/1 | 7/8=87.5% | Li2S, SiP, Lil   | -0.432 |
| 1.16(→0.97) | 0   | 0         | Li3P7, Li2S, Lil | -0.47  |
|             | 7/2 | 7/9=77.8% | Li2S, SiP2, Lil  | -0.46  |
|             | 7/1 | 7/8=87.5% | Li2S, SiP, Lil   | -0.439 |
| 1.15        | 0   | 0         | Li3P7, Li2S, Lil | -0.48  |
|             | 7/2 | 7/9=77.8% | Li2S, SiP2, Lil  | -0.468 |
|             | 7/1 | 7/8=87.5% | Li2S, SiP, Lil   | -0.446 |
| 1.14        | 0   | 0         | Li3P7, Li2S, Lil | -0.489 |
|             | 7/2 | 7/9=77.8% | Li2S, SiP2, Lil  | -0.476 |
|             | 7/1 | 7/8=87.5% | Li2S, SiP, Lil   | -0.454 |
| 1.13        | 0   | 0         | Li3P7, Li2S, Lil | -0.498 |
|             | 7/2 | 7/9=77.8% | Li2S, SiP2, Lil  | -0.484 |
|             | 7/1 | 7/8=87.5% | Li2S, SiP, Lil   | -0.461 |
| 1.12        | 0   | 0         | Li3P7, Li2S, Lil | -0.507 |
|             | 7/2 | 7/9=77.8% | Li2S, SiP2, Lil  | -0.492 |
|             | 7/1 | 7/8=87.5% | Li2S, SiP, Lil   | -0.468 |
| 1.11        | 0   | 0         | Li3P7, Li2S, Lil | -0.517 |
|             | 7/2 | 7/9=77.8% | Li2S, SiP2, Lil  | -0.5   |
|             | 7/1 | 7/8=87.5% | Li2S, SiP, Lil   | -0.476 |
| 1.10        | 0   | 0         | Li3P7, Li2S, Lil | -0.526 |
|             | 7/2 | 7/9=77.8% | Li2S, SiP2, Lil  | -0.508 |
|             | 7/1 | 7/8=87.5% | Li2S, SiP, Lil   | -0.483 |
| 1.09        | 0   | 0         | Li3P7, Li2S, Lil | -0.535 |
|             | 7/2 | 7/9=77.8% | Li2S, SiP2, Lil  | -0.515 |
|             | 7/1 | 7/8=87.5% | Li2S, SiP, Lil   | -0.49  |

|             |     |           |                    |        |
|-------------|-----|-----------|--------------------|--------|
| 1.08        | 0   | 0         | Li3P7, Li2S, Lil   | -0.544 |
|             | 7/2 | 7/9=77.8% | Li2S, SiP2, Lil    | -0.523 |
|             | 7/1 | 7/8=87.5% | Li2S, SiP, Lil     | -0.497 |
| 1.07        | 0   | 0         | Li3P7, Li2S, Lil   | -0.554 |
|             | 7/2 | 7/9=77.8% | Li2S, SiP2, Lil    | -0.531 |
|             | 7/1 | 7/8=87.5% | Li2S, SiP, Lil     | -0.505 |
| 1.06        | 0   | 0         | Li3P7, Li2S, Lil   | -0.563 |
|             | 7/2 | 7/9=77.8% | Li2S, SiP2, Lil    | -0.539 |
|             | 7/1 | 7/8=87.5% | Li2S, SiP, Lil     | -0.512 |
| 1.05        | 0   | 0         | Li3P7, Li2S, Lil   | -0.572 |
|             | 7/2 | 7/9=77.8% | Li2S, SiP2, Lil    | -0.547 |
|             | 7/1 | 7/8=87.5% | Li2S, SiP, Lil     | -0.519 |
| 1.04        | 0   | 0         | Li3P7, Li2S, Lil   | -0.582 |
|             | 7/2 | 7/9=77.8% | Li2S, SiP2, Lil    | -0.555 |
|             | 7/1 | 7/8=87.5% | Li2S, SiP, Lil     | -0.527 |
| 1.03        | 0   | 0         | Li3P7, Li2S, Lil   | -0.591 |
|             | 7/2 | 7/9=77.8% | Li2S, SiP2, Lil    | -0.563 |
|             | 7/1 | 7/8=87.5% | Li2S, SiP, Lil     | -0.534 |
| 1.02        | 0   | 0         | Li3P7, Li2S, Lil   | -0.6   |
|             | 7/2 | 7/9=77.8% | Li2S, SiP2, Lil    | -0.571 |
|             | 7/1 | 7/8=87.5% | Li2S, SiP, Lil     | -0.541 |
| 1.01        | 0   | 0         | Li3P7, Li2S, Lil   | -0.609 |
|             | 7/2 | 7/9=77.8% | Li2S, SiP2, Lil    | -0.578 |
|             | 7/1 | 7/8=87.5% | Li2S, SiP, Lil     | -0.548 |
| 1.00        | 0   | 0         | Li3P7, Li2S, Lil   | -0.619 |
|             | 7/2 | 7/9=77.8% | Li2S, SiP2, Lil    | -0.586 |
|             | 7/1 | 7/8=87.5% | Li2S, SiP, Lil     | -0.556 |
| 0.99        | 0   | 0         | Li3P7, Li2S, Lil   | -0.628 |
|             | 7/2 | 7/9=77.8% | Li2S, SiP2, Lil    | -0.594 |
|             | 7/1 | 7/8=87.5% | Li2S, SiP, Lil     | -0.563 |
| 0.98        | 0   | 0         | Li3P7, Li2S, Lil   | -0.637 |
|             | 7/2 | 7/9=77.8% | Li2S, SiP2, Lil    | -0.602 |
|             | 7/1 | 7/8=87.5% | Li2S, SiP, Lil     | -0.57  |
| 0.97        | 0   | 0         | Li3P7, Li2S, Lil   | -0.646 |
|             | 7/2 | 7/9=77.8% | Li2S, SiP2, Lil    | -0.61  |
|             | 7/1 | 7/8=87.5% | Li2S, SiP, Lil     | -0.578 |
| 0.96(→0.94) | 0   | 0         | Li3P7, Li2S, Lil   | -0.656 |
|             | 7/3 | 7/10=70%  | Li2S, Li5SiP3, Lil | -0.632 |
|             | 7/1 | 7/8=87.5% | Li2S, SiP, Lil     | -0.585 |
| 0.95        | 0   | 0         | Li3P7, Li2S, Lil   | -0.665 |
|             | 7/3 | 7/10=70%  | Li2S, Li5SiP3, Lil | -0.643 |
|             | 7/1 | 7/8=87.5% | Li2S, SiP, Lil     | -0.592 |

|             |     |           |                    |        |
|-------------|-----|-----------|--------------------|--------|
| 0.94        | 0   | 0         | Li3P7, Li2S, Lil   | -0.674 |
|             | 7/3 | 7/10=70%  | Li2S, Li5SiP3, Lil | -0.653 |
|             | 7/1 | 7/8=87.5% | Li2S, SiP, Lil     | -0.599 |
| 0.93(→0.91) | 0   | 0         | LiP, Li2S, Lil     | -0.684 |
|             | 7/3 | 7/10=70%  | Li2S, Li5SiP3, Lil | -0.664 |
|             | 7/1 | 7/8=87.5% | Li2S, SiP, Lil     | -0.607 |
| 0.92        | 0   | 0         | LiP, Li2S, Lil     | -0.694 |
|             | 7/3 | 7/10=70%  | Li2S, Li5SiP3, Lil | -0.675 |
|             | 7/1 | 7/8=87.5% | Li2S, SiP, Lil     | -0.614 |
| 0.91        | 0   | 0         | LiP, Li2S, Lil     | -0.704 |
|             | 7/3 | 7/10=70%  | Li2S, Li5SiP3, Lil | -0.686 |
|             | 7/1 | 7/8=87.5% | Li2S, SiP, Lil     | -0.621 |
| 0.90(→0.87) | 0   | 0         | LiP, Li2S, Lil     | -0.714 |
|             | 7/3 | 7/10=70%  | Li2S, Li5SiP3, Lil | -0.697 |
| 0.89        | 0   | 0         | LiP, Li2S, Lil     | -0.725 |
|             | 7/3 | 7/10=70%  | Li2S, Li5SiP3, Lil | -0.707 |
| 0.88        | 0   | 0         | LiP, Li2S, Lil     | -0.735 |
|             | 7/3 | 7/10=70%  | Li2S, Li5SiP3, Lil | -0.718 |
| 0.87        | 0   | 0         | LiP, Li2S, Lil     | -0.745 |
|             | 7/3 | 7/10=70%  | Li2S, Li5SiP3, Lil | -0.729 |
| 0.86(→0.76) | 0   | 0         | Li3P, Li2S, Lil    | -0.759 |
|             | 7/3 | 7/10=70%  | Li2S, Li5SiP3, Lil | -0.74  |
| 0.85        | 0   | 0         | Li3P, Li2S, Lil    | -0.772 |
|             | 7/3 | 7/10=70%  | Li2S, Li5SiP3, Lil | -0.75  |
| 0.84        | 0   | 0         | Li3P, Li2S, Lil    | -0.786 |
|             | 7/3 | 7/10=70%  | Li2S, Li5SiP3, Lil | -0.761 |
| 0.83        | 0   | 0         | Li3P, Li2S, Lil    | -0.8   |
|             | 7/3 | 7/10=70%  | Li2S, Li5SiP3, Lil | -0.772 |
| 0.82        | 0   | 0         | Li3P, Li2S, Lil    | -0.813 |
|             | 7/3 | 7/10=70%  | Li2S, Li5SiP3, Lil | -0.783 |
| 0.81        | 0   | 0         | Li3P, Li2S, Lil    | -0.827 |
|             | 7/3 | 7/10=70%  | Li2S, Li5SiP3, Lil | -0.793 |
| 0.80        | 0   | 0         | Li3P, Li2S, Lil    | -0.841 |
|             | 7/3 | 7/10=70%  | Li2S, Li5SiP3, Lil | -0.804 |
| 0.79        | 0   | 0         | Li3P, Li2S, Lil    | -0.854 |
|             | 7/3 | 7/10=70%  | Li2S, Li5SiP3, Lil | -0.815 |
| 0.78        | 0   | 0         | Li3P, Li2S, Lil    | -0.868 |
|             | 7/3 | 7/10=70%  | Li2S, Li5SiP3, Lil | -0.826 |
| 0.77        | 0   | 0         | Li3P, Li2S, Lil    | -0.882 |
|             | 7/3 | 7/10=70%  | Li2S, Li5SiP3, Lil | -0.837 |
| 0.76        | 0   | 0         | Li3P, Li2S, Lil    | -0.895 |
|             | 7/3 | 7/10=70%  | Li2S, Li5SiP3, Lil | -0.847 |

|             |   |   |                 |        |
|-------------|---|---|-----------------|--------|
| 0.75(→0.40) | 0 | 0 | Li3P, Li2S, Lil | -0.909 |
| 0.74        | 0 | 0 | Li3P, Li2S, Lil | -0.923 |
| 0.73        | 0 | 0 | Li3P, Li2S, Lil | -0.936 |
| 0.72        | 0 | 0 | Li3P, Li2S, Lil | -0.95  |
| 0.71        | 0 | 0 | Li3P, Li2S, Lil | -0.964 |
| 0.7         | 0 | 0 | Li3P, Li2S, Lil | -0.977 |
| 0.69        | 0 | 0 | Li3P, Li2S, Lil | -0.991 |
| 0.68        | 0 | 0 | Li3P, Li2S, Lil | -1.005 |
| 0.67        | 0 | 0 | Li3P, Li2S, Lil | -1.018 |
| 0.66        | 0 | 0 | Li3P, Li2S, Lil | -1.032 |
| 0.65        | 0 | 0 | Li3P, Li2S, Lil | -1.046 |
| 0.64        | 0 | 0 | Li3P, Li2S, Lil | -1.059 |
| 0.63        | 0 | 0 | Li3P, Li2S, Lil | -1.073 |
| 0.62        | 0 | 0 | Li3P, Li2S, Lil | -1.087 |
| 0.61        | 0 | 0 | Li3P, Li2S, Lil | -1.1   |
| 0.6         | 0 | 0 | Li3P, Li2S, Lil | -1.114 |
| 0.59        | 0 | 0 | Li3P, Li2S, Lil | -1.128 |
| 0.58        | 0 | 0 | Li3P, Li2S, Lil | -1.141 |
| 0.57        | 0 | 0 | Li3P, Li2S, Lil | -1.155 |
| 0.56        | 0 | 0 | Li3P, Li2S, Lil | -1.169 |
| 0.55        | 0 | 0 | Li3P, Li2S, Lil | -1.182 |
| 0.54        | 0 | 0 | Li3P, Li2S, Lil | -1.196 |
| 0.53        | 0 | 0 | Li3P, Li2S, Lil | -1.209 |
| 0.52        | 0 | 0 | Li3P, Li2S, Lil | -1.223 |
| 0.51        | 0 | 0 | Li3P, Li2S, Lil | -1.237 |
| 0.5         | 0 | 0 | Li3P, Li2S, Lil | -1.25  |
| 0.49        | 0 | 0 | Li3P, Li2S, Lil | -1.264 |
| 0.48        | 0 | 0 | Li3P, Li2S, Lil | -1.278 |
| 0.47        | 0 | 0 | Li3P, Li2S, Lil | -1.291 |
| 0.46        | 0 | 0 | Li3P, Li2S, Lil | -1.305 |
| 0.45        | 0 | 0 | Li3P, Li2S, Lil | -1.319 |
| 0.44        | 0 | 0 | Li3P, Li2S, Lil | -1.332 |
| 0.43        | 0 | 0 | Li3P, Li2S, Lil | -1.346 |
| 0.42        | 0 | 0 | Li3P, Li2S, Lil | -1.36  |
| 0.41        | 0 | 0 | Li3P, Li2S, Lil | -1.373 |
| 0.4         | 0 | 0 | Li3P, Li2S, Lil | -1.387 |
| 0.39        | 0 | 0 | Li3P, Li2S, Lil | -1.401 |
|             |   | 1 | LiSi            | -0.007 |
| 0.38(→0.37) | 0 | 0 | Li3P, Li2S, Lil | -1.414 |
|             |   | 1 | Li12Si7         | -0.024 |
| 0.37        | 0 | 0 | Li3P, Li2S, Lil | -1.428 |
|             |   | 1 | Li12Si7         | -0.041 |

|             |   |   |                 |        |
|-------------|---|---|-----------------|--------|
| 0.36(→0.18) | 0 | 0 | Li3P, Li2S, Lil | -1.442 |
|             |   | 1 | Li7Si3          | -0.064 |
| 0.35        | 0 | 0 | Li3P, Li2S, Lil | -1.455 |
|             |   | 1 | Li7Si3          | -0.087 |
| 0.34        | 0 | 0 | Li3P, Li2S, Lil | -1.469 |
|             |   | 1 | Li7Si3          | -0.11  |
| 0.33        | 0 | 0 | Li3P, Li2S, Lil | -1.483 |
|             |   | 1 | Li7Si3          | -0.134 |
| 0.32        | 0 | 0 | Li3P, Li2S, Lil | -1.496 |
|             |   | 1 | Li7Si3          | -0.157 |
| 0.31        | 0 | 0 | Li3P, Li2S, Lil | -1.51  |
|             |   | 1 | Li7Si3          | -0.18  |
| 0.3         | 0 | 0 | Li3P, Li2S, Lil | -1.524 |
|             |   | 1 | Li7Si3          | -0.204 |
| 0.29        | 0 | 0 | Li3P, Li2S, Lil | -1.537 |
|             |   | 1 | Li7Si3          | -0.227 |
| 0.28        | 0 | 0 | Li3P, Li2S, Lil | -1.551 |
|             |   | 1 | Li7Si3          | -0.25  |
| 0.27        | 0 | 0 | Li3P, Li2S, Lil | -1.565 |
|             |   | 1 | Li7Si3          | -0.274 |
| 0.26        | 0 | 0 | Li3P, Li2S, Lil | -1.578 |
|             |   | 1 | Li7Si3          | -0.297 |
| 0.25        | 0 | 0 | Li3P, Li2S, Lil | -1.592 |
|             |   | 1 | Li7Si3          | -0.32  |
| 0.24        | 0 | 0 | Li3P, Li2S, Lil | -1.606 |
|             |   | 1 | Li7Si3          | -0.344 |
| 0.23        | 0 | 0 | Li3P, Li2S, Lil | -1.619 |
|             |   | 1 | Li7Si3          | -0.367 |
| 0.22        | 0 | 0 | Li3P, Li2S, Lil | -1.633 |
|             |   | 1 | Li7Si3          | -0.39  |
| 0.21        | 0 | 0 | Li3P, Li2S, Lil | -1.647 |
|             |   | 1 | Li7Si3          | -0.414 |
| 0.2         | 0 | 0 | Li3P, Li2S, Lil | -1.66  |
|             |   | 1 | Li7Si3          | -0.437 |
| 0.19        | 0 | 0 | Li3P, Li2S, Lil | -1.674 |
|             |   | 1 | Li7Si3          | -0.46  |
| 0.18        | 0 | 0 | Li3P, Li2S, Lil | -1.688 |
|             |   | 1 | Li7Si3          | -0.484 |
| 0.17(→0.13) | 0 | 0 | Li3P, Li2S, Lil | -1.701 |
|             |   | 1 | Li13Si4         | -0.515 |
| 0.16        | 0 | 0 | Li3P, Li2S, Lil | -1.715 |
|             |   | 1 | Li13Si4         | -0.548 |

|                        |   |   |                  |        |
|------------------------|---|---|------------------|--------|
| 0.15                   | 0 | 0 | Li3P, Li2S, Lil  | -1.729 |
|                        |   | 1 | Li13Si4          | -0.58  |
| 0.14                   | 0 | 0 | Li3P, Li2S, Lil  | -1.742 |
|                        |   | 1 | Li13Si4          | -0.613 |
| 0.13                   | 0 | 0 | Li3P, Li2S, Lil  | -1.756 |
|                        |   | 1 | Li13Si4          | -0.645 |
| 0.12( $\rightarrow$ 0) | 0 | 0 | Li3P, Li2S, Lil  | -1.769 |
|                        |   | 1 | Li21Si5 (dashed) | -0.679 |
| 0.11                   | 0 | 0 | Li3P, Li2S, Lil  | -1.783 |
|                        |   | 1 | Li21Si5 (dashed) | -0.721 |
| 0.1                    | 0 | 0 | Li3P, Li2S, Lil  | -1.797 |
|                        |   | 1 | Li21Si5 (dashed) | -0.763 |
| 0.09                   | 0 | 0 | Li3P, Li2S, Lil  | -1.81  |
|                        |   | 1 | Li21Si5 (dashed) | -0.805 |
| 0.08                   | 0 | 0 | Li3P, Li2S, Lil  | -1.824 |
|                        |   | 1 | Li21Si5 (dashed) | -0.847 |
| 0.07                   | 0 | 0 | Li3P, Li2S, Lil  | -1.838 |
|                        |   | 1 | Li21Si5 (dashed) | -0.889 |
| 0.06                   | 0 | 0 | Li3P, Li2S, Lil  | -1.851 |
|                        |   | 1 | Li21Si5 (dashed) | -0.931 |
| 0.05                   | 0 | 0 | Li3P, Li2S, Lil  | -1.865 |
|                        |   | 1 | Li21Si5 (dashed) | -0.973 |
| 0.04                   | 0 | 0 | Li3P, Li2S, Lil  | -1.879 |
|                        |   | 1 | Li21Si5 (dashed) | -1.015 |
| 0.03                   | 0 | 0 | Li3P, Li2S, Lil  | -1.892 |
|                        |   | 1 | Li21Si5 (dashed) | -1.057 |
| 0.02                   | 0 | 0 | Li3P, Li2S, Lil  | -1.906 |
|                        |   | 1 | Li21Si5 (dashed) | -1.099 |
| 0.01                   | 0 | 0 | Li3P, Li2S, Lil  | -1.92  |
|                        |   | 1 | Li21Si5 (dashed) | -1.141 |
| 0                      | 0 | 0 | Li3P, Li2S, Lil  | -1.933 |
|                        |   | 1 | Li21Si5 (dashed) | -1.183 |

Table S3. Summary of calculated electrochemical stability between Si and LBHI

| Voltage (V vs. Li/Li+) | Ratio, Si/LBHI | Molar ratio, Si/(Si+LBHI) | Reaction products                | $E_{rxn}$ (eV/atom) |
|------------------------|----------------|---------------------------|----------------------------------|---------------------|
| 1.50(→0.53)            | 0              | 0                         | (none)                           | (none)              |
| 0.52(→0.40)            | 0              | 0                         | LiH, Li(BH) <sub>6</sub> , LiI   | -0.004              |
| 0.51                   | 0              | 0                         | LiH, Li(BH) <sub>6</sub> , LiI   | -0.008              |
| 0.5                    | 0              | 0                         | LiH, Li(BH) <sub>6</sub> , LiI   | -0.012              |
| 0.49                   | 0              | 0                         | LiH, Li(BH) <sub>6</sub> , LiI   | -0.016              |
| 0.48                   | 0              | 0                         | LiH, Li(BH) <sub>6</sub> , LiI   | -0.02               |
| 0.47                   | 0              | 0                         | LiH, Li(BH) <sub>6</sub> , LiI   | -0.024              |
| 0.46                   | 0              | 0                         | LiH, Li(BH) <sub>6</sub> , LiI   | -0.028              |
| 0.45                   | 0              | 0                         | LiH, Li(BH) <sub>6</sub> , LiI   | -0.032              |
| 0.44                   | 0              | 0                         | LiH, Li(BH) <sub>6</sub> , LiI   | -0.036              |
| 0.43                   | 0              | 0                         | LiH, Li(BH) <sub>6</sub> , LiI   | -0.04               |
| 0.42                   | 0              | 0                         | LiH, Li(BH) <sub>6</sub> , LiI   | -0.044              |
| 0.41                   | 0              | 0                         | LiH, Li(BH) <sub>6</sub> , LiI   | -0.048              |
| 0.4                    | 0              | 0                         | LiH, Li(BH) <sub>6</sub> , LiI   | -0.052              |
|                        |                | 0                         | LiH, Li(BH) <sub>6</sub> , LiI   | -0.056              |
| 0.38                   | 0              | 1                         | LiSi                             | -0.007              |
|                        |                | 0                         | LiH, Li(BH) <sub>6</sub> , LiI   | -0.061              |
|                        |                | 1/2                       | LiH, LiSiB <sub>6</sub> , LiI    | -0.06               |
| 0.37                   | 0              | 1                         | Li <sub>12</sub> Si <sub>7</sub> | -0.024              |
|                        |                | 0                         | LiH, LiB <sub>3</sub> , LiI      | -0.065              |
|                        |                | 1/2                       | LiH, LiSiB <sub>6</sub> , LiI    | -0.066              |
| 0.36                   | 0              | 1                         | Li <sub>12</sub> Si <sub>7</sub> | -0.041              |
|                        |                | 0                         | LiH, LiB <sub>3</sub> , LiI      | -0.071              |
|                        |                | 1/2                       | LiH, LiSiB <sub>6</sub> , LiI    | -0.071              |
| 0.35(→0.18)            | 0              | 1                         | Li <sub>7</sub> Si <sub>3</sub>  | -0.064              |
|                        |                | 0                         | LiH, LiB <sub>3</sub> , LiI      | -0.077              |
|                        |                | 1                         | Li <sub>7</sub> Si <sub>3</sub>  | -0.087              |
| 0.34                   | 0              | 0                         | LiH, LiB <sub>3</sub> , LiI      | -0.084              |
|                        |                | 1                         | Li <sub>7</sub> Si <sub>3</sub>  | -0.110              |
| 0.33                   | 0              | 0                         | LiH, LiB <sub>3</sub> , LiI      | -0.09               |
|                        |                | 1                         | Li <sub>7</sub> Si <sub>3</sub>  | -0.134              |
| 0.32                   | 0              | 0                         | LiH, LiB <sub>3</sub> , LiI      | -0.096              |
|                        |                | 1                         | Li <sub>7</sub> Si <sub>3</sub>  | -0.157              |
| 0.31                   | 0              | 0                         | LiH, LiB <sub>3</sub> , LiI      | -0.102              |
|                        |                | 1                         | Li <sub>7</sub> Si <sub>3</sub>  | -0.18               |
| 0.3                    | 0              | 0                         | LiH, LiB <sub>3</sub> , LiI      | -0.109              |
|                        |                | 1                         | Li <sub>7</sub> Si <sub>3</sub>  | -0.204              |
| 0.29                   | 0              | 0                         | LiH, LiB <sub>3</sub> , LiI      | -0.115              |
|                        |                | 1                         | Li <sub>7</sub> Si <sub>3</sub>  | -0.227              |



|             |   |   |                  |        |
|-------------|---|---|------------------|--------|
| 0.28        | 0 | 0 | LiH, LiB3, Lil   | -0.121 |
|             |   | 1 | Li7Si3           | -0.25  |
| 0.27        | 0 | 0 | LiH, LiB3, Lil   | -0.127 |
|             |   | 1 | Li7Si3           | -0.274 |
| 0.26        | 0 | 0 | LiH, LiB3, Lil   | -0.134 |
|             |   | 1 | Li7Si3           | -0.297 |
| 0.25        | 0 | 0 | LiH, LiB3, Lil   | -0.14  |
|             |   | 1 | Li7Si3           | -0.32  |
| 0.24        | 0 | 0 | LiH, LiB3, Lil   | -0.146 |
|             |   | 1 | Li7Si3           | -0.344 |
| 0.23        | 0 | 0 | LiH, LiB3, Lil   | -0.152 |
|             |   | 1 | Li7Si3           | -0.367 |
| 0.22        | 0 | 0 | LiH, LiB3, Lil   | -0.159 |
|             |   | 1 | Li7Si3           | -0.39  |
| 0.21        | 0 | 0 | LiH, LiB3, Lil   | -0.165 |
|             |   | 1 | Li7Si3           | -0.414 |
| 0.20        | 0 | 0 | LiH, LiB3, Lil   | -0.171 |
|             |   | 1 | Li7Si3           | -0.437 |
| 0.19        | 0 | 0 | LiH, LiB3, Lil   | -0.177 |
|             |   | 1 | Li7Si3           | -0.46  |
| 0.18        | 0 | 0 | LiH, LiB3, Lil   | -0.184 |
|             |   | 1 | Li7Si3           | -0.484 |
| 0.17(→0.13) | 0 | 0 | LiH, LiB3, Lil   | -0.19  |
|             |   | 1 | Li13Si4          | -0.515 |
| 0.16        | 0 | 0 | LiH, LiB3, Lil   | -0.196 |
|             |   | 1 | Li13Si4          | -0.548 |
| 0.15        | 0 | 0 | LiH, LiB3, Lil   | -0.202 |
|             |   | 1 | Li13Si4          | -0.58  |
| 0.14        | 0 | 0 | LiH, LiB3, Lil   | -0.209 |
|             |   | 1 | Li13Si4          | -0.613 |
| 0.13        | 0 | 0 | LiH, LiB3, Lil   | -0.215 |
|             |   | 1 | Li13Si4          | -0.645 |
| 0.12(→0.05) | 0 | 0 | LiH, LiB3, Lil   | -0.221 |
|             |   | 1 | Li21Si5 (dashed) | -0.679 |
| 0.11        | 0 | 0 | LiH, LiB3, Lil   | -0.227 |
|             |   | 1 | Li21Si5 (dashed) | -0.721 |
| 0.10        | 0 | 0 | LiH, LiB3, Lil   | -0.234 |
|             |   | 1 | Li21Si5 (dashed) | -0.763 |
| 0.09        | 0 | 0 | LiH, LiB3, Lil   | -0.24  |
|             |   | 1 | Li21Si5 (dashed) | -0.805 |
| 0.08        | 0 | 0 | LiH, LiB3, Lil   | -0.246 |
|             |   | 1 | Li21Si5 (dashed) | -0.847 |

|          |   |   |                                          |        |
|----------|---|---|------------------------------------------|--------|
| 0.07     | 0 | 0 | LiH, LiB <sub>3</sub> , LiI              | -0.252 |
|          |   | 1 | Li <sub>2</sub> Si <sub>5</sub> (dashed) | -0.889 |
| 0.06     | 0 | 0 | LiH, LiB <sub>3</sub> , LiI              | -0.259 |
|          |   | 1 | Li <sub>2</sub> Si <sub>5</sub> (dashed) | -0.931 |
| 0.05     | 0 | 0 | LiH, LiB <sub>3</sub> , LiI              | -0.265 |
|          |   | 1 | Li <sub>2</sub> Si <sub>5</sub> (dashed) | -0.973 |
| 0.04(→0) | 0 | 0 | LiH, LiB, LiI                            | -0.271 |
|          |   | 1 | Li <sub>2</sub> Si <sub>5</sub> (dashed) | -1.015 |
| 0.03     | 0 | 0 | LiH, LiB, LiI                            | -0.279 |
|          |   | 1 | Li <sub>2</sub> Si <sub>5</sub> (dashed) | -1.057 |
| 0.02     | 0 | 0 | LiH, LiB, LiI                            | -0.286 |
|          |   | 1 | Li <sub>2</sub> Si <sub>5</sub> (dashed) | -1.099 |
| 0.01     | 0 | 0 | LiH, LiB, LiI                            | -0.294 |
|          |   | 1 | Li <sub>2</sub> Si <sub>5</sub> (dashed) | -1.141 |
| 0        | 0 | 0 | LiH, LiB, LiI                            | -0.301 |
|          |   | 1 | Li <sub>2</sub> Si <sub>5</sub> (dashed) | -1.183 |

Table S4.1 Summary of calculated chemical stability between Si and LBHI

| Molar ratio, Si/(Si+LBH4-Li) | Reaction products | $E_{rxtrxt}$ (eV/atom) |
|------------------------------|-------------------|------------------------|
| 0                            | LBHI              | 0                      |
| 1                            | Si                | 0                      |

Table S4.2 Summary of calculated chemical stability between Si and LPSI

| Molar ratio, Si/(Si+LPS-Li) | Reaction products                                                              | $E_{rxtrxt}$ (eV/atom) |
|-----------------------------|--------------------------------------------------------------------------------|------------------------|
| 0                           | LPSI                                                                           | 0                      |
| 0.7778                      | Li <sub>10</sub> Si(PS <sub>6</sub> ) <sub>2</sub> , LiI, SiS <sub>2</sub> , P | -0.047                 |
| 0.8974                      | Li <sub>2</sub> S, LiI, SiS <sub>2</sub> , P                                   | -0.096                 |
| 0.9245                      | SiP <sub>2</sub> , Li <sub>2</sub> S, LiI, SiS <sub>2</sub>                    | -0.108                 |
| 0.9403                      | SiP, Li <sub>2</sub> S, LiI, SiS <sub>2</sub>                                  | -0.111                 |
| 1                           | Si                                                                             | 0                      |

Table S4.3 Summary of calculated chemical stability between Si and LPS

| Molar ratio, Si/(Si+LPS) | Reaction products                                                              | $E_{rxtrxt}$ (eV/atom) |
|--------------------------|--------------------------------------------------------------------------------|------------------------|
| 0                        | LPS                                                                            | 0                      |
| 0.3333                   | Li <sub>10</sub> Si(PS <sub>6</sub> ) <sub>2</sub> , LiI, SiS <sub>2</sub> , P | -0.056                 |
| 0.5555                   | Li <sub>2</sub> S, SiS <sub>2</sub> , P                                        | -0.114                 |
| 0.6364                   | SiP <sub>2</sub> , Li <sub>2</sub> S, SiS <sub>2</sub>                         | -0.128                 |
| 0.6923                   | SiP, Li <sub>2</sub> S, SiS <sub>2</sub>                                       | -0.129                 |
| 1                        | Si                                                                             | 0                      |

Table S5.1 Summary of calculated chemical stability between Li<sub>15</sub>Si<sub>4</sub> and LBHI

| Molar ratio,<br>Li <sub>15</sub> Si <sub>4</sub> /(Li <sub>15</sub> Si <sub>4</sub> +LBHI) | Reaction products                                                    | $E_{rxtrxt}$ (eV/atom) |
|--------------------------------------------------------------------------------------------|----------------------------------------------------------------------|------------------------|
| 0                                                                                          | LBHI                                                                 | 0                      |
| 0.3023                                                                                     | Li(BH) <sub>6</sub> , LiH, Lil,<br>Si                                | -0.053                 |
| 0.3714                                                                                     | LiSi, Li(BH) <sub>6</sub> , LiH,<br>Lil                              | -0.056                 |
| 0.4439                                                                                     | Li <sub>12</sub> Si <sub>7</sub> , Li(BH) <sub>6</sub> ,<br>LiH, Lil | -0.058                 |
| 0.5149                                                                                     | Li <sub>12</sub> Si <sub>7</sub> , LiSiB <sub>6</sub> ,<br>LiH, Lil  | -0.059                 |
| 0.5952                                                                                     | LiSiB <sub>6</sub> , Li <sub>7</sub> Si <sub>3</sub> ,<br>LiH, Lil   | -0.06                  |
| 0.7975                                                                                     | Li <sub>13</sub> Si <sub>4</sub> , LiSiB <sub>6</sub> ,<br>LiH, Lil  | -0.035                 |
| 1                                                                                          | Li <sub>13</sub> Si <sub>4</sub> , Li <sub>21</sub> Si <sub>5</sub>  | -0.003                 |

Table S5.2 Summary of calculated chemical stability between Li<sub>15</sub>Si<sub>4</sub> and LPSI

| Molar ratio,<br>Li <sub>15</sub> Si <sub>4</sub> /(Li <sub>15</sub> Si <sub>4</sub> +LPSI) | Reaction products                                                                 | $E_{rxtrxt}$ (eV/atom) |
|--------------------------------------------------------------------------------------------|-----------------------------------------------------------------------------------|------------------------|
| 0                                                                                          | LPSI                                                                              | 0                      |
| 0.3302                                                                                     | Li <sub>10</sub> Si(PS <sub>6</sub> ) <sub>2</sub> ,<br>Li <sub>2</sub> S, Lil, P | -0.161                 |
| 0.5303                                                                                     | Li <sub>2</sub> S, Lil, SiS <sub>2</sub> , P                                      | -0.31                  |
| 0.6125                                                                                     | SiP <sub>2</sub> , Li <sub>2</sub> S, Lil,<br>SiS <sub>2</sub>                    | -0.379                 |
| 0.6702                                                                                     | SiP, Li <sub>2</sub> S, Lil, SiS <sub>2</sub>                                     | -0.43                  |
| 0.7                                                                                        | SiP, Li <sub>2</sub> S, Lil, Si                                                   | -0.456                 |
| 0.7568                                                                                     | Li <sub>5</sub> SiP <sub>3</sub> , Li <sub>2</sub> S, Lil,<br>Si                  | -0.459                 |
| 0.7887                                                                                     | Li <sub>3</sub> P, Li <sub>2</sub> S, Lil, Si                                     | -0.451                 |
| 0.8358                                                                                     | LiSi, Li <sub>3</sub> P, Li <sub>2</sub> S,<br>Lil                                | -0.392                 |
| 0.8731                                                                                     | Li <sub>12</sub> Si <sub>7</sub> , Li <sub>3</sub> P,<br>Li <sub>2</sub> S, Lil   | -0.338                 |
| 0.9081                                                                                     | Li <sub>7</sub> Si <sub>3</sub> , Li <sub>3</sub> P, Li <sub>2</sub> S,<br>Lil    | -0.277                 |
| 0.9655                                                                                     | Li <sub>13</sub> Si <sub>4</sub> , Li <sub>3</sub> P,<br>Li <sub>2</sub> S, Lil   | -0.123                 |
| 1                                                                                          | Li <sub>13</sub> Si <sub>4</sub> , Li <sub>21</sub> Si <sub>5</sub>               | -0.003                 |

Table S5.3 Summary of calculated chemical stability between Li<sub>15</sub>Si<sub>4</sub> and LPS

| Molar ratio,<br>Li <sub>15</sub> Si <sub>4</sub> /(Li <sub>15</sub> Si <sub>4</sub> +LPS) | Reaction<br>products                                                         | $E_{rxn}$ (eV/atom) |
|-------------------------------------------------------------------------------------------|------------------------------------------------------------------------------|---------------------|
| 0                                                                                         | LPS                                                                          | 0                   |
| 0.0658                                                                                    | Li <sub>10</sub> Si(PS <sub>6</sub> ) <sub>2</sub> ,<br>Li <sub>2</sub> S, P | -0.191              |
| 0.1389                                                                                    | SiS <sub>2</sub> , Li <sub>2</sub> S, P                                      | -0.358              |
| 0.1842                                                                                    | SiP <sub>2</sub> , SiS <sub>2</sub> , Li <sub>2</sub> S                      | -0.432              |
| 0.225                                                                                     | SiP, SiS <sub>2</sub> , Li <sub>2</sub> S                                    | -0.485              |
| 0.25                                                                                      | SiP, Li <sub>2</sub> S, Si                                                   | -0.511              |
| 0.3077                                                                                    | Li <sub>5</sub> SiP <sub>3</sub> , Li <sub>2</sub> S, Si                     | -0.506              |
| 0.3478                                                                                    | Li <sub>3</sub> P, Li <sub>2</sub> S, Si                                     | -0.493              |
| 0.4211                                                                                    | LiSi, Li <sub>3</sub> P, Li <sub>2</sub> S                                   | -0.423              |
| 0.4956                                                                                    | Li <sub>12</sub> Si <sub>7</sub> , Li <sub>3</sub> P,<br>Li <sub>2</sub> S   | -0.36               |
| 0.5854                                                                                    | Li <sub>7</sub> Si <sub>3</sub> , Li <sub>3</sub> P, Li <sub>2</sub> S       | -0.291              |
| 0.8                                                                                       | Li <sub>13</sub> Si <sub>4</sub> , Li <sub>3</sub> P,<br>Li <sub>2</sub> S   | -0.126              |
| 1                                                                                         | Li <sub>13</sub> Si <sub>4</sub> , Li <sub>21</sub> Si <sub>5</sub>          | -0.003              |

Table S6. References for ICEs

| References | ICE/% | Paper title                                                                                                                                                                            |
|------------|-------|----------------------------------------------------------------------------------------------------------------------------------------------------------------------------------------|
| L1         | 59.9  | Disposing of excessive decomposition and destructive intercalation of solvated Li <sup>+</sup> in CNT-based flexible 3D Si anode of flexible battery                                   |
| L2         | 70    | Rationally engineered amorphous TiO <sub>x</sub> /Si/TiO <sub>x</sub> nanomembrane as an anode material for high energy lithium ion battery                                            |
| L3         | 74    | Silicene Flowers: A Dual Stabilized Silicon Building Block for High-Performance Lithium Battery Anodes                                                                                 |
| L4         | 75.32 | Overcome the fundamental challenge for PVDF binder to use with silicon anode with super-molecular nano-layer                                                                           |
| L5         | 78.5  | Hollow Si nanospheres with amorphous TiO <sub>2</sub> layer used as anode for high-performance Li-ion battery                                                                          |
| L6         | 79.1  | Synthesis of Ultrathin Silicon Nanosheets by Using Graphene Oxide as Template                                                                                                          |
| L7         | 80    | Water-Soluble Polymer Assists Multisize Three-Dimensional Microspheres as a High-Performance Si Anode for Lithium-Ion Batteries                                                        |
| L8         | 80.1  | Mesoporous Silicon Hollow Nanocubes Derived from Metal–Organic Framework Template for Advanced Lithium-Ion Battery Anode                                                               |
|            | 80.1  | Sustainable silicon micro-dendritic anodes integrated by a moderately cross-linked polymer binder with superior elasticity and adhesion                                                |
| L9         | 81    | Vapor-solid-solid growth of silicon nanowires using magnesium seeds and their electrochemical performance in Li-ion battery anodes                                                     |
| L10        | 81.2  | Si nanoparticles confined within a conductive 2D porous Cu-based metal–organic framework (Cu <sub>3</sub> (HITP) <sub>2</sub> ) as potential anodes for high-capacity Li-ion batteries |
|            | 81.2  | Self-standing mesoporous Si films as anodes for lithium-ion microbatteries                                                                                                             |
| L11        | 81.4  | Reversible Storage of Lithium in Silver-Coated Three-Dimensional Macroporous Silicon                                                                                                   |
| L12        | 82.5  | Synthesis of 3D stacked silicon nanosheets via electrochemical reduction of attapulgite in molten salt for high-performance lithium-ion batteries anode                                |
| L13        | 83    | Confining invasion directions of Li <sup>+</sup> to achieve efficient Si anode material for lithium-ion batteries                                                                      |
| L14        | 83.1  | Self-Templating Construction of 3D Hierarchical Macro-Mesoporous Silicon from 0D Silica Nanoparticles                                                                                  |
| L15        | 83.6  | In-situ migration of Ni induced crystallization to boost the initial coulombic efficiency of nano Si anode for lithium ion batteries                                                   |

|     |      |                                                                                                                                                                               |
|-----|------|-------------------------------------------------------------------------------------------------------------------------------------------------------------------------------|
| L16 | 84   | High-performance lithium-ion battery with nano-porous polycrystalline silicon particles as anode                                                                              |
| L17 | 85   | Bulk-Nanoporous-Silicon Negative Electrode with Extremely High Cyclability for Lithium-Ion Batteries Prepared Using a Top-Down Process                                        |
| L18 | 86   | High-capacity silicon electrodes obtained from the hydrogen production process by aluminum alloy hydrolysis                                                                   |
|     | 86   | Effect of vinylene carbonate electrolyte additive and battery cycling protocol on the electrochemical and cyclability performance of silicon thin-film anodes                 |
| L19 | 86.4 | Ionic Conductive Self-Healing Polymer Binders with Poly(ether-thioureas) Segments for High-Performance Silicon Anodes in Lithium-Ion Batteries                                |
| L20 | 86.5 | Effect of Size and Shape on Electrochemical Performance of Nano-Silicon-Based Lithium Battery                                                                                 |
| L21 | 86.7 | Dual Cross-Linked Polymer Networks Derived from the Hyperbranched Poly(ethyleneimine) and Poly(acrylic acid) as Efficient Binders for Silicon Anodes in Lithium-Ion Batteries |
| L22 | 87.9 | Surface-Oxidation-Induced Constrained Volume Expansion of Commercial Silicon Flakes as High-Performance Anode Material for Lithium-Ion Batteries                              |
| L23 | 88   | Nanoporous silicon prepared through air-oxidation demagnesiumation of Mg <sub>2</sub> Si and properties of its lithium ion batteries                                          |
| L24 | 88.1 | High-yield synthesis of ultrathin silicon nanosheets by physical grinding enables robust lithium-ion storage                                                                  |
| L25 | 89   | Si nanoflake-assembled blocks towards high initial coulombic efficiency anodes for lithium-ion batteries                                                                      |
|     | 89   | Boron-doped porous Si anode materials with high initial coulombic efficiency and long cycling stability                                                                       |
| L26 | 89.5 | Novel constructive self-healing binder for silicon anodes with high mass loading in lithium-ion batteries                                                                     |
| L27 | 89.6 | Effects of Pyrolysis on High-Capacity Si-Based Anode of Lithium Ion Battery with High Coulombic Efficiency and Long Cycling Life                                              |
| L28 | 90.2 | Electrolyte Design Enabling a High-Safety and High- Performance Si Anode with a Tailored Electrode–Electrolyte Interphase                                                     |
| L29 | 90.4 | A compared investigation of different biogum polymer binders for silicon anode of lithium-ion batteries                                                                       |
| L30 | 91   | Carboxymethylated tamarind polysaccharide gum as a green binder for silicon-based lithium-ion battery anodes                                                                  |
| L31 | 91.1 | In Situ Polymerized and Imidized Si@Polyimide Microcapsules with Flexible Solid-Electrolyte Interphase and Enhanced Electrochemical Activity for Li-Storage                   |

|     |      |                                                                                                                                                      |
|-----|------|------------------------------------------------------------------------------------------------------------------------------------------------------|
| L32 | 91.4 | Regulating adhesion of solid-electrolyte interphase to silicon via covalent bonding strategy towards high Coulombic-efficiency anodes                |
| L33 | 92   | A Highly Efficient Silicone-Modified Polyamide Acid Binder for Silicon-Based Anode in Lithium-Ion Batteries                                          |
|     | 92   | Improving Electrochemical Performance of Thick Silicon Film Anodes with Implanted Solid Lithium Source Electrolyte                                   |
| L34 | 92.7 | Multiscale Hyperporous Silicon Flake Anodes for High Initial Coulombic Efficiency and Cycle Stability                                                |
| L35 | 93.2 | Silicon Anode with High Initial Coulombic Efficiency by Modulated Trifunctional Binder for High-Areal-Capacity Lithium-Ion Batteries                 |
|     | 93.2 | Cross-Linking Network of Soft–Rigid Dual Chains to Effectively Suppress Volume Change of Silicon Anode                                               |
|     |      |                                                                                                                                                      |
| S1  | 54   | Electrochemical Performance of All-Solid-State Li-Ion Batteries Based on Garnet Electrolyte Using Silicon as a Model Electrode                       |
| S2  | 60.1 | Sustainable Interfaces between Si Anodes and Garnet Electrolytes for Room-Temperature Solid-State Batteries                                          |
| S3  | 64.5 | Si nanoparticles embedded in carbon nanofiber sheathed with Li <sub>6</sub> PS <sub>5</sub> Cl as an anode material for all-solid-state batteries    |
| S4  | 69   | Microscopic observation of nanoporous Si-Li <sub>3</sub> PS <sub>4</sub> interface in composite anodes with stable cyclability                       |
|     | 69   | Performance improvement of nanoporous Si composite anodes in all-solid-state lithium-ion batteries by using acetylene black as a conductive additive |
| S5  | 71   | Stable cyclability of porous Si anode applied for sulfide-based all-solid-state batteries                                                            |
|     | 71   | Stable Cyclability Caused by Highly Dispersed Nanoporous Si Composite Anodes with Sulfide-based Solid Electrolyte                                    |
| S6  | 83.2 | A silicon anode for garnet-based all-solid-state batteries/ Interfaces and nanomechanics                                                             |
| S7  | 84   | Enabling High-Energy Solid-State Batteries with Stable Anode Interphase by the Use of Columnar Silicon Anodes                                        |
| S8  | 85.6 | Microstructure Study of Electrochemically Driven Li <sub>x</sub> Si                                                                                  |
|     | 85.6 | Long-Cycling Sulfide-Based All-Solid-State Batteries Enabled by Electrochemo-Mechanically Stable Electrodes                                          |
| S9  | 92   | An amorphous Si film anode for all-solid-state lithium batteries                                                                                     |
| S10 | 94   | Porous amorphous silicon film anodes for high- capacity and stable all-solid-state lithium batteries                                                 |



Table S7. Theoretical volume change of Si-LPS composite after lithiation from 1.5 to 0 V vs. Li<sup>+</sup>/Li. The reactions are obtained from Table S1. Here, the bulk volume (V, normalized by formula unit) of each chemical, the total volume (V<sub>tot</sub>) of precursors and products, as well as the ratio (V<sub>tot</sub> ratio) of product volume over precursor volume are listed for each reaction.

| <b>0–0.12 V</b>                    | Precursors            |       | → | Products                            |
|------------------------------------|-----------------------|-------|---|-------------------------------------|
|                                    | Si                    | 4.2Li | → | 0.2Li <sub>21</sub> Si <sub>5</sub> |
| V (A <sup>3</sup> /formula unit)   | 20.44375              | 20.11 |   | 397.815625                          |
| V <sub>tot</sub> (A <sup>3</sup> ) | 20.44375 (without Li) |       |   | 79.563125                           |
| V <sub>tot</sub> ratio             | 389.18%               |       |   |                                     |

| <b>0.13–0.17 V</b>                 | Precursors            |        | → | Products                             |
|------------------------------------|-----------------------|--------|---|--------------------------------------|
|                                    | Si                    | 3.25Li | → | 0.25Li <sub>13</sub> Si <sub>4</sub> |
| V (A <sup>3</sup> /formula unit)   | 20.44375              | 20.11  |   | 262.065                              |
| V <sub>tot</sub> (A <sup>3</sup> ) | 20.44375 (without Li) |        |   | 65.51625                             |
| V <sub>tot</sub> ratio             | 320.47%               |        |   |                                      |

| <b>0.18–0.36 V</b>                 | Precursors            |         | → | Products                              |
|------------------------------------|-----------------------|---------|---|---------------------------------------|
|                                    | Si                    | 2.333Li | → | 0.3333Li <sub>7</sub> Si <sub>3</sub> |
| V (A <sup>3</sup> /formula unit)   | 20.44375              | 20.11   |   | 149.293333                            |
| V <sub>tot</sub> (A <sup>3</sup> ) | 20.44375 (without Li) |         |   | 49.76444                              |
| V <sub>tot</sub> ratio             | 243.42%               |         |   |                                       |

| <b>0.37–0.38 V</b>                 | Precursors            |         | → | Products                               |
|------------------------------------|-----------------------|---------|---|----------------------------------------|
|                                    | Si                    | 1.714Li | → | 0.1429Li <sub>12</sub> Si <sub>7</sub> |
| V (A <sup>3</sup> /formula unit)   | 20.44375              | 20.11   |   | 299.5025                               |
| V <sub>tot</sub> (A <sup>3</sup> ) | 20.44375 (without Li) |         |   | 42.7989                                |
| V <sub>tot</sub> ratio             | 209.35%               |         |   |                                        |

| <b>0.39 V</b>                      | Precursors            |       | → | Products |
|------------------------------------|-----------------------|-------|---|----------|
|                                    | Si                    | Li    | → | LiSi     |
| V (A <sup>3</sup> /formula unit)   | 20.44375              | 20.11 |   | 31.21375 |
| V <sub>tot</sub> (A <sup>3</sup> ) | 20.44375 (without Li) |       |   | 31.21375 |
| V <sub>tot</sub> ratio             | 152.68%               |       |   |          |

| <b>0–0.86 V</b>                    | Precursors          |       | → | Products |        |
|------------------------------------|---------------------|-------|---|----------|--------|
|                                    | 4Li3PS4             | 32Li  | → | 4Li3P    | 16Li2S |
| V (A <sup>3</sup> /formula unit)   | 166.5375            | 20.11 |   | 58.82    | 46.82  |
| V <sub>tot</sub> (A <sup>3</sup> ) | 666.15 (without Li) |       |   | 984.4    |        |
| V <sub>tot</sub> ratio             | 147.77%             |       |   |          |        |

| <b>0.76–0.96 V</b>                 | Precursors               |          |         | → | Products      |           |
|------------------------------------|--------------------------|----------|---------|---|---------------|-----------|
|                                    | 1.714Li3PS4              | 0.5714Si | 11.43Li | → | 0.5714Li5SiP3 | 6.857Li2S |
| V (A <sup>3</sup> /formula unit)   | 166.5375                 | 20.44375 | 20.11   |   | 154           | 46.82     |
| V <sub>tot</sub> (A <sup>3</sup> ) | 297.1268338 (without Li) |          |         |   | 409.04034     |           |
| V <sub>tot</sub> ratio             | 137.67%                  |          |         |   |               |           |

| <b>0.87–0.93 V</b>                 | Precursors          |       | → | Products |        |
|------------------------------------|---------------------|-------|---|----------|--------|
|                                    | 4Li3PS4             | 24Li  | → | 4LiP     | 16Li2S |
| V (A <sup>3</sup> /formula unit)   | 166.5375            | 20.11 |   | 31.41    | 46.82  |
| V <sub>tot</sub> (A <sup>3</sup> ) | 666.15 (without Li) |       |   | 874.76   |        |
| V <sub>tot</sub> ratio             | 131.32%             |       |   |          |        |

| <b>0.91–1.49 V</b>                 | Precursors           |          |       | → | Products |         |
|------------------------------------|----------------------|----------|-------|---|----------|---------|
|                                    | 0.8Li3PS4            | 0.8Si    | 4Li   | → | 0.8SiP   | 3.2Li2S |
| V (A <sup>3</sup> /formula unit)   | 166.5375             | 20.44375 | 20.11 |   | 47.233   | 46.82   |
| V <sub>tot</sub> (A <sup>3</sup> ) | 149.585 (without Li) |          |       |   | 187.6104 |         |
| V <sub>tot</sub> ratio             | 125.42%              |          |       |   |          |         |

| <b>0.94–1.16 V</b>                 | Precursors          |         | → | Products    |        |
|------------------------------------|---------------------|---------|---|-------------|--------|
|                                    | 4Li3PS4             | 21.71Li | → | 0.5714Li3P7 | 16Li2S |
| V (A <sup>3</sup> /formula unit)   | 166.5375            | 20.11   |   | 199.0325    | 46.82  |
| V <sub>tot</sub> (A <sup>3</sup> ) | 666.15 (without Li) |         |   | 862.8471705 |        |
| V <sub>tot</sub> ratio             | 129.53%             |         |   |             |        |

| <b>0.97–1.49 V</b>                 | Precursors               |          |         | → | Products    |           |
|------------------------------------|--------------------------|----------|---------|---|-------------|-----------|
|                                    | 1.333Li3PS4              | 0.6667Si | 6.667Li | → | 0.6667SiP2  | 5.333Li2S |
| V (A <sup>3</sup> /formula unit)   | 166.5375                 | 20.44375 | 20.11   |   | 70.8325     | 46.82     |
| V <sub>tot</sub> (A <sup>3</sup> ) | 235.6243356 (without Li) |          |         |   | 296.9150878 |           |
| V <sub>tot</sub> ratio             | 126.01%                  |          |         |   |             |           |

| <b>1.17–1.27 V</b>                 | Precursors                       |         | → | Products               |                     |
|------------------------------------|----------------------------------|---------|---|------------------------|---------------------|
|                                    | 4Li <sub>3</sub> PS <sub>4</sub> | 20.57Li | → | 0.5714LiP <sub>7</sub> | 16Li <sub>2</sub> S |
| V (A <sup>3</sup> /formula unit)   | 166.5375                         | 20.11   |   | 117.64                 | 46.82               |
| V <sub>tot</sub> (A <sup>3</sup> ) | 666.15 (without Li)              |         |   | 816.339496             |                     |
| V <sub>tot</sub> ratio             | 122.55%                          |         |   |                        |                     |

| <b>1.28–1.49 V</b>                 | Precursors                       |       | → | Products  |                     |
|------------------------------------|----------------------------------|-------|---|-----------|---------------------|
|                                    | 4Li <sub>3</sub> PS <sub>4</sub> | 20Li  | → | 4P        | 16Li <sub>2</sub> S |
| V (A <sup>3</sup> /formula unit)   | 166.5375                         | 20.11 |   | 26.52166  | 46.82               |
| V <sub>tot</sub> (A <sup>3</sup> ) | 666.15 (without Li)              |       |   | 855.20664 |                     |
| V <sub>tot</sub> ratio             | 128.38%                          |       |   |           |                     |

Table S8. Theoretical volume change of Si-LPSI composite after lithiation from 1.5 to 0 V vs. Li<sup>+</sup>/Li. The reactions are obtained from Table S2. Here, the bulk volume (V, normalized by formula unit) of each chemical, the total volume (V<sub>tot</sub>) of precursors and products, as well as the ratio (V<sub>tot</sub> ratio) of product volume over precursor volume are listed for each reaction.

| <b>0–0.12 V</b>                    | Precursors            |       | → | Products                            |
|------------------------------------|-----------------------|-------|---|-------------------------------------|
|                                    | Si                    | 4.2Li | → | 0.2Li <sub>21</sub> Si <sub>5</sub> |
| V (A <sup>3</sup> /formula unit)   | 20.44375              | 20.11 |   | 397.815625                          |
| V <sub>tot</sub> (A <sup>3</sup> ) | 20.44375 (without Li) |       |   | 79.563125                           |
| V <sub>tot</sub> ratio             | 389.18%               |       |   |                                     |

| <b>0.13–0.17 V</b>                 | Precursors            |        | → | Products                             |
|------------------------------------|-----------------------|--------|---|--------------------------------------|
|                                    | Si                    | 3.25Li | → | 0.25Li <sub>13</sub> Si <sub>4</sub> |
| V (A <sup>3</sup> /formula unit)   | 20.44375              | 20.11  |   | 262.065                              |
| V <sub>tot</sub> (A <sup>3</sup> ) | 20.44375 (without Li) |        |   | 65.51625                             |
| V <sub>tot</sub> ratio             | 320.47%               |        |   |                                      |

| <b>0.18–0.36 V</b>                 | Precursors            |         | → | Products                              |
|------------------------------------|-----------------------|---------|---|---------------------------------------|
|                                    | Si                    | 2.333Li | → | 0.3333Li <sub>7</sub> Si <sub>3</sub> |
| V (A <sup>3</sup> /formula unit)   | 20.44375              | 20.11   |   | 149.293333                            |
| V <sub>tot</sub> (A <sup>3</sup> ) | 20.44375 (without Li) |         |   | 49.76444                              |
| V <sub>tot</sub> ratio             | 243.42%               |         |   |                                       |

| <b>0.37–0.38 V</b>                 | Precursors            |         | → | Products                               |
|------------------------------------|-----------------------|---------|---|----------------------------------------|
|                                    | Si                    | 1.714Li | → | 0.1429Li <sub>12</sub> Si <sub>7</sub> |
| V (A <sup>3</sup> /formula unit)   | 20.44375              | 20.11   |   | 299.5025                               |
| V <sub>tot</sub> (A <sup>3</sup> ) | 20.44375 (without Li) |         |   | 42.7989                                |
| V <sub>tot</sub> ratio             | 209.35%               |         |   |                                        |

| <b>0.39 V</b>                      | Precursors            |       | → | Products |
|------------------------------------|-----------------------|-------|---|----------|
|                                    | Si                    | Li    | → | LiSi     |
| V (A <sup>3</sup> /formula unit)   | 20.44375              | 20.11 |   | 31.21375 |
| V <sub>tot</sub> (A <sup>3</sup> ) | 20.44375 (without Li) |       |   | 31.21375 |
| V <sub>tot</sub> ratio             | 152.68%               |       |   |          |

| <b>0–0.86 V</b>                    | Precursors                              |       |  | → | Products           |                     |       |
|------------------------------------|-----------------------------------------|-------|--|---|--------------------|---------------------|-------|
|                                    | Li <sub>2</sub> 7P7(S14I3) <sub>2</sub> | 56Li  |  | → | 7Li <sub>3</sub> P | 28Li <sub>2</sub> S | 6LiI  |
| V (A <sup>3</sup> /formula unit)   | 1567.8825                               | 20.11 |  |   | 58.82              | 46.82               | 67.02 |
| V <sub>tot</sub> (A <sup>3</sup> ) | 1567.8825 (without Li)                  |       |  |   | 2124.82            |                     |       |
| V <sub>tot</sub> ratio             | 135.52%                                 |       |  |   |                    |                     |       |

| <b>0.76–0.96 V</b>                 | Precursors                                 |          |       | → | Products                            |                      |        |
|------------------------------------|--------------------------------------------|----------|-------|---|-------------------------------------|----------------------|--------|
|                                    | 0.3Li <sub>2</sub> 7P7(S14I3) <sub>2</sub> | 0.7Si    | 14Li  | → | 0.7Li <sub>5</sub> SiP <sub>3</sub> | 8.4Li <sub>2</sub> S | 1.8LiI |
| V (A <sup>3</sup> /formula unit)   | 1567.8825                                  | 20.44375 | 20.11 |   | 154                                 | 46.82                | 67.02  |
| V <sub>tot</sub> (A <sup>3</sup> ) | 484.675375 (without Li)                    |          |       |   | 621.724                             |                      |        |
| V <sub>tot</sub> ratio             | 128.28%                                    |          |       |   |                                     |                      |        |

| <b>0.87–0.93 V</b>                 | Precursors                              |       |  | → | Products |                     |       |
|------------------------------------|-----------------------------------------|-------|--|---|----------|---------------------|-------|
|                                    | Li <sub>2</sub> 7P7(S14I3) <sub>2</sub> | 42Li  |  | → | 7LiP     | 28Li <sub>2</sub> S | 6LiI  |
| V (A <sup>3</sup> /formula unit)   | 1567.8825                               | 20.11 |  |   | 31.41    | 46.82               | 67.02 |
| V <sub>tot</sub> (A <sup>3</sup> ) | 1567.8825 (without Li)                  |       |  |   | 1932.95  |                     |       |
| V <sub>tot</sub> ratio             | 123.28%                                 |       |  |   |          |                     |       |

| <b>0.91–1.49 V</b>                 | Precursors                                       |          |         | → | Products   |                      |         |
|------------------------------------|--------------------------------------------------|----------|---------|---|------------|----------------------|---------|
|                                    | 0.125<br>Li <sub>2</sub> 7P7(S14I3) <sub>2</sub> | 0.875Si  | 4.375Li | → | 0.875SiP   | 3.5Li <sub>2</sub> S | 0.75LiI |
| V (A <sup>3</sup> /formula unit)   | 1567.8825                                        | 20.44375 | 20.11   |   | 47.233     | 46.82                | 67.02   |
| V <sub>tot</sub> (A <sup>3</sup> ) | 213.8735938 (without Li)                         |          |         |   | 255.463875 |                      |         |
| V <sub>tot</sub> ratio             | 119.45%                                          |          |         |   |            |                      |         |

| <b>0.94–1.16 V</b>                 | Precursors                              |       |  | → | Products                       |                     |       |
|------------------------------------|-----------------------------------------|-------|--|---|--------------------------------|---------------------|-------|
|                                    | Li <sub>2</sub> 7P7(S14I3) <sub>2</sub> | 38Li  |  | → | Li <sub>3</sub> P <sub>7</sub> | 28Li <sub>2</sub> S | 6LiI  |
| V (A <sup>3</sup> /formula unit)   | 1567.8825                               | 20.11 |  |   | 199.0325                       | 46.82               | 67.02 |
| V <sub>tot</sub> (A <sup>3</sup> ) | 1567.8825 (without Li)                  |       |  |   | 1912.1125                      |                     |       |
| V <sub>tot</sub> ratio             | 121.96%                                 |       |  |   |                                |                     |       |

| <b>0.97–1.49 V</b>                 | Precursors                                    |          |         | → | Products               |                        |          |
|------------------------------------|-----------------------------------------------|----------|---------|---|------------------------|------------------------|----------|
|                                    | 0.2222Li <sub>2</sub> 7P7(S14I3) <sub>2</sub> | 0.7778Si | 7.778Li | → | 0.7778SiP <sub>2</sub> | 6.222Li <sub>2</sub> S | 1.333LiI |
| V (A <sup>3</sup> /formula unit)   | 1567.8825                                     | 20.44375 | 20.11   |   | 70.8325                | 46.82                  | 67.02    |
| V <sub>tot</sub> (A <sup>3</sup> ) | 364.2846403 (without Li)                      |          |         |   | 435.7452185            |                        |          |
| V <sub>tot</sub> ratio             | 119.62%                                       |          |         |   |                        |                        |          |

| <b>1.17–1.27 V</b>                 | Precursors             |       | → | Products |        |       |
|------------------------------------|------------------------|-------|---|----------|--------|-------|
|                                    | Li27P7(S14I3)2         | 36Li  | → | LiP7     | 28Li2S | 6LiI  |
| V (A <sup>3</sup> /formula unit)   | 1567.8825              | 20.11 |   | 117.64   | 46.82  | 67.02 |
| V <sub>tot</sub> (A <sup>3</sup> ) | 1567.8825 (without Li) |       |   | 1830.72  |        |       |
| V <sub>tot</sub> ratio             | 116.76%                |       |   |          |        |       |

| <b>1.28–1.49 V</b>                 | Precursors             |       | → | Products   |        |       |
|------------------------------------|------------------------|-------|---|------------|--------|-------|
|                                    | Li27P7(S14I3)2         | 35Li  | → | 7P         | 28Li2S | 6LiI  |
| V (A <sup>3</sup> /formula unit)   | 1567.8825              | 20.11 |   | 26.52166   | 46.82  | 67.02 |
| V <sub>tot</sub> (A <sup>3</sup> ) | 1567.8825 (without Li) |       |   | 1898.73162 |        |       |
| V <sub>tot</sub> ratio             | 121.10%                |       |   |            |        |       |

Table S9. Theoretical volume change of Si-LBHI composite after lithiation from 1.5 to 0 V vs. Li<sup>+</sup>/Li. The reactions are obtained from Table S3. Here, the bulk volume (V, normalized by formula unit) of each chemical, the total volume (V<sub>tot</sub>) of precursors and products, as well as the ratio (V<sub>tot</sub> ratio) of product volume over precursor volume are listed for each reaction.

| <b>0–0.12 V</b>                    | Precursors            |       | → | Products                            |
|------------------------------------|-----------------------|-------|---|-------------------------------------|
|                                    | Si                    | 4.2Li | → | 0.2Li <sub>21</sub> Si <sub>5</sub> |
| V (A <sup>3</sup> /formula unit)   | 20.44375              | 20.11 |   | 397.815625                          |
| V <sub>tot</sub> (A <sup>3</sup> ) | 20.44375 (without Li) |       |   | 79.563125                           |
| V <sub>tot</sub> ratio             | 389.18%               |       |   |                                     |

| <b>0.13–0.17 V</b>                 | Precursors            |        | → | Products                             |
|------------------------------------|-----------------------|--------|---|--------------------------------------|
|                                    | Si                    | 3.25Li | → | 0.25Li <sub>13</sub> Si <sub>4</sub> |
| V (A <sup>3</sup> /formula unit)   | 20.44375              | 20.11  |   | 262.065                              |
| V <sub>tot</sub> (A <sup>3</sup> ) | 20.44375 (without Li) |        |   | 65.51625                             |
| V <sub>tot</sub> ratio             | 320.47%               |        |   |                                      |

| <b>0.18–0.36 V</b>                 | Precursors            |         | → | Products                              |
|------------------------------------|-----------------------|---------|---|---------------------------------------|
|                                    | Si                    | 2.333Li | → | 0.3333Li <sub>7</sub> Si <sub>3</sub> |
| V (A <sup>3</sup> /formula unit)   | 20.44375              | 20.11   |   | 149.293333                            |
| V <sub>tot</sub> (A <sup>3</sup> ) | 20.44375 (without Li) |         |   | 49.76444                              |
| V <sub>tot</sub> ratio             | 243.42%               |         |   |                                       |

| <b>0.37–0.38 V</b>                 | Precursors            |         | → | Products                               |
|------------------------------------|-----------------------|---------|---|----------------------------------------|
|                                    | Si                    | 1.714Li | → | 0.1429Li <sub>12</sub> Si <sub>7</sub> |
| V (A <sup>3</sup> /formula unit)   | 20.44375              | 20.11   |   | 299.5025                               |
| V <sub>tot</sub> (A <sup>3</sup> ) | 20.44375 (without Li) |         |   | 42.7989                                |
| V <sub>tot</sub> ratio             | 209.35%               |         |   |                                        |

| <b>0.39 V</b>                      | Precursors            |       | → | Products |
|------------------------------------|-----------------------|-------|---|----------|
|                                    | Si                    | Li    | → | LiSi     |
| V (A <sup>3</sup> /formula unit)   | 20.44375              | 20.11 |   | 31.21375 |
| V <sub>tot</sub> (A <sup>3</sup> ) | 20.44375 (without Li) |       |   | 31.21375 |
| V <sub>tot</sub> ratio             | 152.68%               |       |   |          |

| <b>0–0.04 V</b>                    | Precursors                                       |       | → | Products |        |       |
|------------------------------------|--------------------------------------------------|-------|---|----------|--------|-------|
|                                    | Li <sub>4</sub> B <sub>3</sub> H <sub>12</sub> I | 12Li  | → | 12LiH    | 3LiB   | LiI   |
| V (A <sup>3</sup> /formula unit)   | 233.0325                                         | 20.11 |   | 16.0025  | 21.725 | 67.02 |
| V <sub>tot</sub> (A <sup>3</sup> ) | 233.0325 (without Li)                            |       |   | 324.225  |        |       |
| V <sub>tot</sub> ratio             | 139.13%                                          |       |   |          |        |       |

| <b>0.05–0.37 V</b>                 | Precursors                                       |       | → | Products |                  |       |
|------------------------------------|--------------------------------------------------|-------|---|----------|------------------|-------|
|                                    | Li <sub>4</sub> B <sub>3</sub> H <sub>12</sub> I | 10Li  | → | 12LiH    | LiB <sub>3</sub> | LiI   |
| V (A <sup>3</sup> /formula unit)   | 233.0325                                         | 20.11 |   | 16.0025  | 37.23            | 67.02 |
| V <sub>tot</sub> (A <sup>3</sup> ) | 233.0325 (without Li)                            |       |   | 296.28   |                  |       |
| V <sub>tot</sub> ratio             | 127.14%                                          |       |   |          |                  |       |

| <b>0.36–0.38 V</b>                 | Precursors                                             |          |         | → | Products                 |         |           |
|------------------------------------|--------------------------------------------------------|----------|---------|---|--------------------------|---------|-----------|
|                                    | 0.6667Li <sub>4</sub> B <sub>3</sub> H <sub>12</sub> I | 0.3333Si | 6.333Li | → | 0.3333LiSiB <sub>6</sub> | 8LiH    | 0.6667LiI |
| V (A <sup>3</sup> /formula unit)   | 233.0325                                               | 20.44375 | 20.11   |   | 70.85875                 | 16.0025 | 67.02     |
| V <sub>tot</sub> (A <sup>3</sup> ) | 162.1766696 (without Li)                               |          |         |   | 196.3194554              |         |           |
| V <sub>tot</sub> ratio             | 121.05 %                                               |          |         |   |                          |         |           |

| <b>0.38–0.52 V</b>                 | Precursors                                       |       | → | Products   |                        |       |
|------------------------------------|--------------------------------------------------|-------|---|------------|------------------------|-------|
|                                    | Li <sub>4</sub> B <sub>3</sub> H <sub>12</sub> I | 6.5Li | → | 9LiH       | 0.5Li(BH) <sub>6</sub> | LiI   |
| V (A <sup>3</sup> /formula unit)   | 233.0325                                         | 20.11 |   | 16.0025    | 111.96875              | 67.02 |
| V <sub>tot</sub> (A <sup>3</sup> ) | 233.0325 (without Li)                            |       |   | 267.026875 |                        |       |
| V <sub>tot</sub> ratio             | 114.59 %                                         |       |   |            |                        |       |
